# Supplementary material for: A Semi-automated Instrument for Cellular Oxidative Potential Evaluation (SCOPE) of Water-soluble Extracts of Ambient Particulate Matter
Source: Copernicus journal article supplement (doi:10.5194/amt-2021-188), 2021-07-22
Supplement: Supplementary file [file amt-2021-188-AC1-supplement.pdf]

Dr. Mingjin Tang

Associate Editor Atmospheric Measurement Techniques

Dear Dr. Mingjin Tang,

Along with this letter, we have submitted our response document for the manuscript “A Semi-automated Instrument for Cellular Oxidative Potential Evaluation (SCOPE) of Water-soluble Extracts of Ambient Particulate Matter”. All the comments raised by the reviewers have been satisfactorily addressed based on a point-by-point response in the attached document. Additional experiments are performed to address some of the comments and their results have been included in the manuscript. To facilitate the review process, we have also included the marked-up version of our revised manuscript (track-changes mode), so that the reviewers can see how the comments are incorporated in the manuscript. The manuscript has been substantially improved as a result of this review and we really appreciate all the valuable suggestions provided by the reviewers.

We believe that our revised manuscript meets the high-quality standards of AMT, and we look forward to any further comments the reviewers and editor might have.

Sincerely,

Sudheer Salana

Graduate Student

Department of Civil and Environmental Engineering

University of Illinois at Urbana-Champaign

205 N Mathews Ave, Urbana, IL 61801

Reviewer #1: Salana et al. work presented an automated syringe-pump system for assessing the ROS generation from alveolar macrophage when incubated with different samples. The manuscript has discussed the setup, running procedures, LOD, precision, comparison to manual method, and the calibration of the system. I think this is a very unique study that can be inspiring to many readers on AMT. I recommend acceptance after the authors address the following minor comments.

1. A batch of samples can take up to 5 hours as mentioned in the manuscript. This means the cell suspensions are left in the system for up to 5 hours. How healthy cells after sitting in an environment outside of the incubator for a couple hours? Do cell numbers change over time? The authors should add some discussions regarding this.

### Response

We thank the reviewer for this suggestion. Before, designing the protocol of our instrument, we conducted an experiment by keeping the cells outside an incubator but in a temperature-controlled environment (i.e., 37 °C maintained through a thermomixer used in our instrument), and measured the cell viability using trypan blue. The results of this experiment are shown in Fig. R1. We found that over a period of 5 hours, the cell viability decreased by only 6%. However, the cell viability starts decreasing sharply beyond 6 hours. Therefore, we limited the cells exposure to the outside environment for only five hours. In fact, the results of this experiment were the basis for limiting the maximum number of the samples (N=6), that can be analyzed in one batch of this instrument. Based on the reviewer's suggestion, we have added figure S1 (and the details of this experiment) in the supplementary information of the revised manuscript, showing the variations in cell viability as a function of time, and added this discussion on Page 4, lines 121-125 of the revised manuscript. *“Before designing the protocol of our instrument, we conducted an experiment by keeping the cells outside an incubator but in a temperature-controlled environment (i.e., 37 °C maintained through a thermomixer used in our instrument) and measured the cell viability using trypan blue [see Figure S1 in the supplementary information (SI)]. We found that over a period of 5 hours, the cell viability decreased by only 6%. However, the cell viability started decreasing sharply beyond 6 hours. Therefore, we limited the cells exposure to the outside environment for only five hours.”*

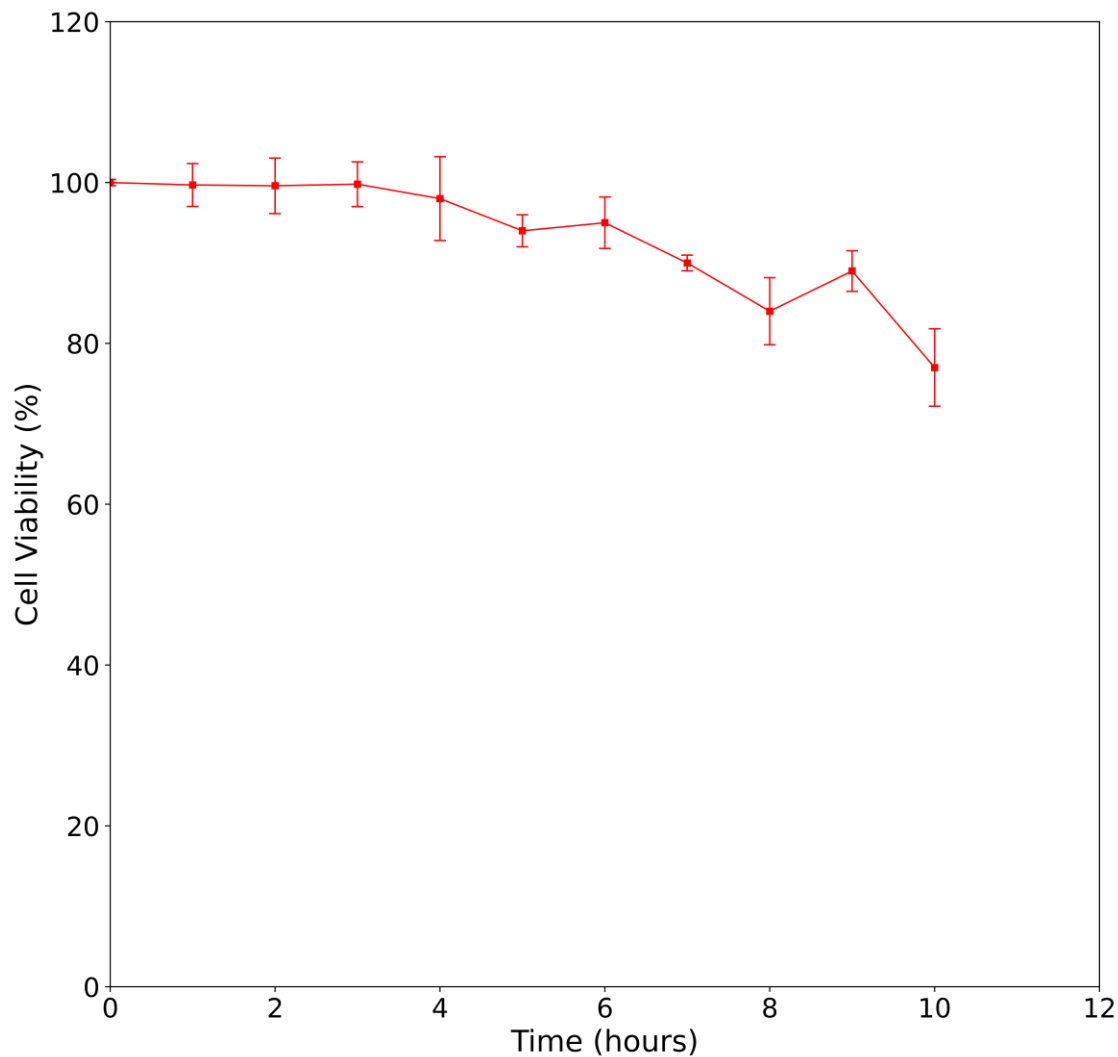

**Figure R1:** Variation in cell viability [(viable cells/total cells) \*100] for NR8383 cells suspended in 1XSGM at 37 °C (outside an incubator) as a function of time. Cell Viability was measured using Trypan Blue Assay. 100  $\mu$ L of 0.4% trypan blue solution was mixed with 100  $\mu$ L of cells and incubated for 3 minutes at room temperature. After incubation, 10  $\mu$ L of the mixture was withdrawn, applied to a hemocytometer and viable cells (unstained cells) were counted under a microscope. Error bars denote one standard deviation of the average (N=3).

2. Line 227, fig 4 should be fig 3.

**Response**

We apologize for this mistake. On Line 261 of the revised manuscript, Fig. 4 has been changed to Fig. 3.

3. line 231, I agree with what the authors say about express LOD in terms of standards but providing a rough liquid concentrations or doses of PM extracts can be very helpful to readers. This gives ideas of how much mass is required to have a signal above detection limit.

#### Response

Based on our extensive measurements, we find it generally hard to detect a signal if the PM concentration in our liquid extract is less than 20 µg/mL. Therefore, we have added the following sentences to the manuscript on Page 9, Line 265-267.

*“Nevertheless, based on several experiments, we found that it is difficult to detect a signal for a PM extract with concentration below 20 µg/mL, which could be considered as a rough detection limit for SCOPE.”*

4. line 255 “0.04 to 9.75 mM” please use mg/mL to keep consistency in units.

#### Response

All the units have been converted to mg/mL

5. Fig 6, error bars seem quite high. Please provide statistical analysis.

#### Response

Based on the reviewer’s suggestion, we have conducted a one-way ANOVA (analysis of variance) test followed by Tukey’s test for post-hoc analysis on the intrinsic OP responses of different groups of the species, i.e., the metals, organic compounds and inorganic compounds. Based on these results, we have added following sentences on Page 11, Lines 323-336, Lines 358-359, Lines 351-353 and Page 12, Lines 371-372 of the revised manuscript:

*“To assess significant differences in the OP responses, we used a one-way ANOVA (analysis of variance) test followed by Tukey’s test for post-hoc analysis on the intrinsic OP responses of different groups of the species, i.e., metals, organic and inorganic compounds. Among metals, Fe (II), Mn (II), and Cu (II) induced the highest response (12.40 -9.95 mg/mL t-BOOH). Although, the OP of these three metals were not statistically different from each other, their responses were significantly different from the rest of the metals ( $p < 0.05$ ). Other metals [Fe (III), Zn (II), Pb (II), Al (III), Cr (III), Cd (II) and V(III)] induced very low response ( $< 4.5$  mg/mL t-BOOH), and there was no statistical difference among their responses ( $p > 0.05$ ). Interestingly, the pattern of Fe (III) vs. Fe (II) OP response (~3 times lower response of Fe III than Fe II) matches with their relative redox activities as measured by the dithiothreitol (DTT) assay, i.e., 3 times lower intrinsic DTT activity of Fe (III) compared to Fe (II) (Charrier and Anastasio, 2012).*

*Among the organic compounds, PQN and 1,2-NQN showed the highest response (7.51 and 6.52 mg/mL t-BOOH, respectively), however, their responses were significantly lower ( $p > 0.05$ ) than that of the metals Fe (II), Mn (II) and Cu (II). Other than these two quinones, the OP of any of the organic compounds, i.e PAHs, 1, 4-NQN and 5-H-1,4-NQN was not significantly above the negative control.”*

*“Inorganic salts showed the lowest responses among all tested compounds and there was no significant difference in the responses ( $p > 0.05$ ; one-way ANOVA) of any of these salts. “*

Reviewer # 2: The authors present a new semi-automated instrument to assess cellular oxidative potential (OP) when exposed to particulate matter, based on the DCFH-DA assay, which is capable of analyzing six samples in only 5 hours. Furthermore, they investigate the intrinsic OP of a range of standards which are of interest with respect to ambient PM OP. The authors discuss the functionality of the method, as well as the operational procedure, calibration, limit of detection and reproducibility. This is a novel and interesting method for quantifying cellular OP representing a significant technical advancement, and certainly fits the scope of AMT. I recommend publication after considering the following minor comments:

Line 122 – It is unclear what the negative control actually is, please elaborate

#### Response

The negative control was always the deionized Milli-Q water (DI). We have clarified this on Page 5, Line 153.

Line 161 – Why specifically was tertbutyl hydroperoxide chosen as the positive control as opposed to e.g. H<sub>2</sub>O<sub>2</sub>?

#### Response

Tertbutyl hydroperoxide (t-BOOH) is a well-established inducer of the cellular oxidative stress. t-BOOH diffuses through the cell membrane quite efficiently and has been demonstrated to induce a comprehensive oxidative stress response through the generation of a variety of species including H<sub>2</sub>O<sub>2</sub>, alkoxyl and peroxy radicals. For example, t-BOOH is more stable in cellular systems compared to H<sub>2</sub>O<sub>2</sub> which can easily undergo degradation by catalases (cellular enzymes that protect cells from oxidative damage) and therefore is a better positive control to understand cellular defense mechanisms (Abe and Saito 1998). t-BOOH has also been found to be a better at glutathione (GSH) depletion as compared to other oxidants (Dierickx et al., 1999), inhibiting peroxiredoxin (an antioxidant protein that protects certain enzymes from oxidative damage) activity (Ikeda et al., 2011), evoke a more consistent cellular antioxidant response (Alia et al., 2005), cause a greater DNA damage than H<sub>2</sub>O<sub>2</sub> (Slamenova et al., 2013) and promote a more efficient peroxidation of membrane lipids as compared to H<sub>2</sub>O<sub>2</sub> (Guidarelli et al., 1997). t-BOOH is also a better model for the organic hydroperoxides that are formed when the cellular fatty acids and proteins react with oxygen during pathological conditions (Chance et al., 1979). All these properties of t-BOOH make it an excellent positive control. There are other positive controls such as Menadion, which are used in pharmacological studies, however the low cost and easy availability of t-BOOH makes it a better choice.

The following lines have been added to manuscript on Page 10, Line 284-292:

*“t-BOOH is a well-established inducer of oxidative stress, not only in macrophages (Lopes et al., 2017; Prasad et al., 2007; Roux et al., 2019) but also in a variety of other cells such as hepatocytes (Kučera et al., 2014), sperm cells (Fatemi et al., 2012), and lung fibroblast cells (Lopes et al., 2017). t-BOOH diffuses through the cell membrane quite efficiently and has been demonstrated to induce a comprehensive oxidative stress response through the generation of a variety of species including H<sub>2</sub>O<sub>2</sub>, alkoxyl and peroxy radicals. t-BOOH has also been found to be more stable in*

*the cellular systems (Abe and Saito 1998), and also a better at glutathione (GSH) depletion (Dierickx et al., 1999), inhibiting peroxiredoxin activity (Ikeda et al., 2011), evoke a more consistent cellular antioxidant response (Alia et al., 2005), cause a greater DNA damage (Slamenova et al., 2013) and promote a more efficient peroxidation of membrane lipids as compared to other oxidants such as H<sub>2</sub>O<sub>2</sub> (Guidarelli et al., 1997).”*

Line 166 – Is a DCFH-DA control performed alongside each 2 hour cell measurement, or before the batch 6 batches of cells are analysed? Is there any change in the DCFH-DA stock reactivity over the 5-hour period that could complicate quantification due to degradation etc?

### Response

Previous studies have indicated that DCFH-DA is generally a stable probe for at least a period of 2-3 hours (Landreman et al., 2008). Moreover, it has been shown that DCFH-DA is highly stable in HEPES buffer [used in our Salt Glucose Media (SGM)] and does not show any autooxidation in such culture media (Le Bel and Bondy, 1990; Arbogast and Reid, 2004). Therefore, we did not perform a DCFH-DA control alongside the 2-hour ROS measurement. However, to further confirm these findings and to address the reviewer’s comment, we conducted an experiment in our lab to measure the variations in absolute fluorescence of DCFH-DA as a function of time to assess its degradation or autooxidation. In this experiment DCFH-DA was prepared as discussed in Section 2.2 of the manuscript and transferred to two different amber vials. One of these vials was stored in the thermomixer at 37 °C and the other vial was stored at room temperature (23 °C). Changes in fluorescence of DCFH-DA in each vial was measured at every 30 minutes, for a period of up to 6 hours. The results of this experiment are shown in Fig. R2.

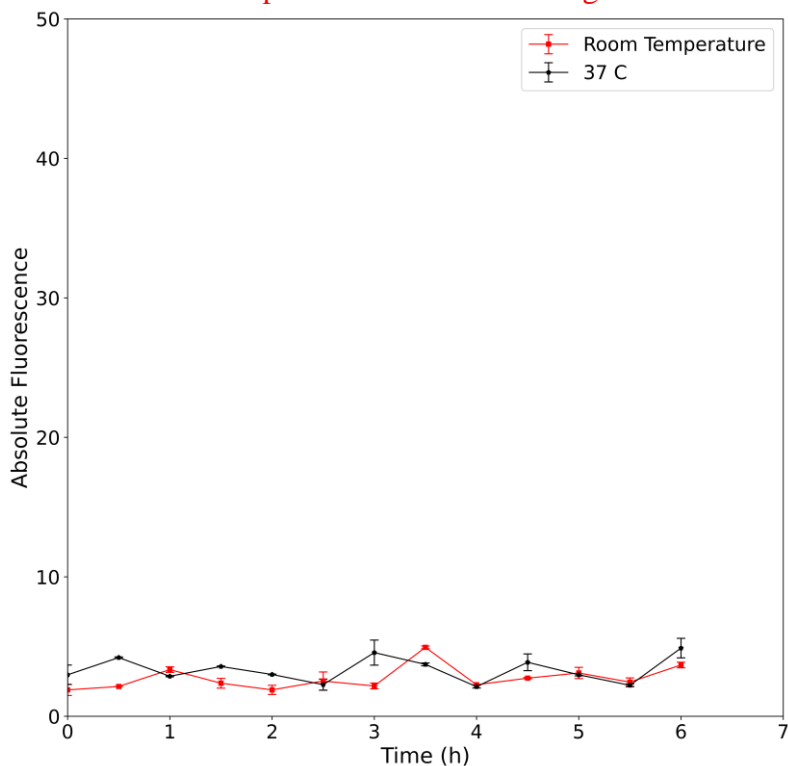

**Figure R2:** Variation in the absolute fluorescence of DCFH-DA as a function of time. DCFH-DA Error bars denote one standard deviation of the mean (N=3 replicates).

As can be seen in Fig. R2 the absolute fluorescence of DCFH-DA remains almost constant in either condition which indicates that there is no appreciable degradation of DCFH-DA within 5-hour period. We have added this figure in the SI (Fig. S2) and the related discussion on Page 5, Line 131-135:

*“We measured the variation in absolute fluorescence of DCFH-DA as a function of time to assess the possible degradation or autooxidation of DCFH-DA during our measurement. The results showed that the absolute fluorescence of DCFH-DA remains constant for a period of at least 6 hours, indicating the stability of the probe within our experimental timeframe (please refer to Fig. S2 in SI).”*

Line 227 – should this be Figure 3?

Response

Yes, we apologize for our mistake. This is Fig. 3. On Line 261 of the revised manuscript, Fig. 4 has been changed to Fig. 3.

Line 234 – mg/ml and  $\mu\text{M}$  units are used interchangeable through the manuscript, consistent units would be beneficial for comparison.

Response

All the units have been changed to mg/mL for consistency.

Line 237 – what values were used for PM normalization, the extracted PM mass in mg/ml?

Response

We apologize for the confusion. The ROS response for the PM samples was normalized by *concentration of the PM extract* (and not by the PM mass) in the RV. Since, final concentration of the PM in RV for the precision experiment was  $30\ \mu\text{g}/\text{mL}$ , we normalized the ROS response by this value, i.e.,  $0.03\ \text{mg}/\text{mL}$ , to obtain the final results in the units of mg of t-BOOH per mg of PM. We have provided this detail in the SI of the manuscript (section S1). We have also corrected it in the manuscript, on Page 9, lines 273.

Figure 1 – This Figure could benefit from a more descriptive Figure caption to make it easier to follow the schematic.

Response

The following paragraph has been added to the caption.

*“The instrument consists of four major units: cells reservoir and samples holder, fluid transfer unit, incubation-cum-reaction unit, and the measurement unit. The cells reservoir and sample holder unit consists of a set of several vials, containing cells, DCFH-DA solution, and the samples, all kept in Thermomixer 1. The fluid transfer unit consists of three syringe pumps (Pump #1, 2, and 3) and a 14-port multi-position valve connected to Pump #2. The incubation-cum-reaction unit consists of 17 Reaction Vials (RV), held in Thermomixer 2. The measurement unit consists of a spectrofluorometer equipped with a Flowcell.”*

Figure 6 – The three panels in the Figure should be labelled A-C.

**Response**

We thank the reviewers for this suggestion. The panels have been labelled as a-c.

Figure 6 – The error bars associated with Figures 6 A-C are in some cases quite large, could the authors comment on the source of this variability?

**Response**

The error bars are mostly high for the species, which have intrinsic OP less than 5 mg/mL t-BOOH. This is probably due to low sensitivity of the instrument at that range which causes an amplification of variability when the OP response is closer to the detection limit. We could have tried to increase the concentration of these species to reliably measure their intrinsic OP, however, that would make these concentrations beyond the typical range for their atmospherically relevant levels. Essentially, the low intrinsic activity with high error bars indicates a very low contribution of these species in the overall cellular OP measured by the macrophage ROS assay, at their atmospherically relevant concentrations.

Reviewer # 3 - This study introduced a semi-automated instrument for measuring cellular ROS formation potential (OP) of ambient PM and associated components in murine alveolar cells. This system was calibrated using dichlorofluorescein diacetate (DCFH-DA) as ROS probe and tert-Butyl hydroperoxide (t-BOOH) as standard compound for positive control. The authors found that metals, quinones, PAHs and inorganic salts exhibit different macrophage OP, claiming for the feasibility of using this system for assessing the cytotoxicity of different type of air pollutants. Overall the study is interesting and the topic fits the journal of AMT. However, the written of the manuscript needs some improvement before consideration of publishable potency. Detailed comments are as follows:

1. The authors need to justify and demonstrate why t-BOOH is chosen as standard compound for calibration.

**Response**

This comment is similar to the comment # 2 raised by the 2<sup>nd</sup> reviewer, therefore, we are reproducing our response here again.

“Tertbutyl hydroperoxide (t-BOOH) is a well-established inducer of oxidative stress. t-BOOH diffuses through the cell membrane quite efficiently and has been demonstrated to induce a comprehensive oxidative stress response through the generation of a variety of species including H<sub>2</sub>O<sub>2</sub>, alkoxyl and peroxy radicals. For example, t-BOOH is more stable in cellular systems compared to H<sub>2</sub>O<sub>2</sub> which can easily undergo degradation by catalases (cellular enzymes that protect cells from oxidative damage) and therefore is a better positive control to understand cellular defense mechanisms (Abe and Saito 1998). t-BOOH has also been found to be a better at glutathione (GSH) depletion as compared to other oxidants (Dierickx et al., 1999), inhibiting peroxiredoxin (an important antioxidant protein that protects certain enzymes from oxidative damage) activity (Ikeda et al., 2011), evoke a more consistent cellular antioxidant response (Alia et al., 2005), cause a greater DNA damage than H<sub>2</sub>O<sub>2</sub>, (Slamenova et al., 2013) and promote a more efficient peroxidation of membrane lipids as compared to H<sub>2</sub>O<sub>2</sub>, (Guidarelli et al., 1997). t-



BOOH is also a better model for the organic hydroperoxides that are formed when the cellular fatty acids and proteins react with oxygen during pathological conditions (Chance et al., 1979). All these properties of t-BOOH make it an excellent positive control. There are other positive controls such as Menadion, which are used in pharmacological studies, however the low cost and easy availability of t-BOOH makes it a better choice.”

We have added this discussion in our manuscript (Page 10, Line 284-292).

2. Why choose rat alveolar macrophages? In previous studies, canine, human, and other different types of macrophages have been used as metrics (e.g. Beck-Speier et al., Oxidative stress and lipid mediators induced in alveolar macrophages by ultrafine particles. *Free Radic. Biol. Med.* 38, 1080-1092, 2005.). The calibrations in these studies were based on different standards. It is almost certain that OP of same PM samples from different macrophage assays will be different, including the current method. How do illustrate the baseline and OP differences across different methods?

#### Response

We agree with the reviewer that OP analysis of the same PM samples from different macrophage assays will yield different results. A number of previous studies have indeed used macrophages of canine, human, hamster and murine origin. However, rat macrophages (particularly NR8383) are still one of the most widely used cell lines in the PM studies and therefore, its use in our instrument makes it easier for comparison among different studies. Certain characteristics of this cell line make it one of the best macrophage models available for the evaluation of OP. These characteristics include minimal maintenance (can be studied in a BSL-1 lab) and highly reproducible results that are comparable to primary cells (Helmke et al., 1988). Moreover, NR8383 is superior for studying inflammatory responses and immune defense system compared to commonly used cell lines such RAW264.7 (murine), A549, U937 and THP-1 (all human macrophage cell lines). This is because unlike other cell lines, it has the ability to express the Mannose Receptor, which is a key protein linked to macrophage function (Lane et al., 1998). NR8383 also expresses a number of inflammatory cytokines such as IL-1 $\beta$  and TNF- $\alpha$  (Lin et al., 2000), thus it will allow us to link the results obtained from this instrument to these inflammatory responses, in our future studies.

As the reviewer has pointed out, establishment of a baseline and comparison of OP across different cell lines is a difficult task. This will require a systematic comparison of different cell lines with different types of PM samples, and as such will be a huge analysis effort by itself. Our automated instrument is a small but an important step in the direction of facilitating such measurements. At present, the instrument uses rat alveolar macrophages, however, in the future, we can possibly customize it to use for other cell lines as well. This will really help in making a systematic comparison among different cell lines and hopefully establishing a baseline. However, it is beyond the scope of our current study.

Considering the reviewer’s suggestion, we have added following sentences in the revised manuscript on Page 4, Line 109-114:

*“We have used a murine cell line, NR8383, as it is one of the most widely used cell lines in the PM studies. Certain characteristics of this cell line make it one of the best macrophage models available for the evaluation of PM OP. These characteristics include minimal maintenance (can be studied in a BSL-1 lab) and highly reproducible results that are comparable to primary cells (Helmke et al., 1988). NR8383 also expresses a number of inflammatory cytokines such as IL-1 $\beta$  and TNF- $\alpha$  (Lin et al., 2000), thus it will allow us to link the results obtained from this instrument to these inflammatory responses, in our future studies”*

3. The selectivity of the DCFH method toward different types of ROS should be discussed. If the ROS yields of certain concentrations of ambient PM and t-BOOH are the same, but the types of ROS (e.g. radicals and H<sub>2</sub>O<sub>2</sub>) formed by them are different, how to justify the health impact of ambient PM? The sensitivity/reactivity of the DCFH with different PM components (e.g. metal ions vs quinones) rather than with ROS should be considered and discussed.

#### Response

DCFH-DA is a non-specific ROS probe. Although it was originally believed that DCFH-DA was specific to H<sub>2</sub>O<sub>2</sub> (Keston and Brandt, 1965), this was not the case as found in a later study (Le Bel et al., 1992). Since a broad range of oxygen species oxidize DCFH, it provides a general assessment of the overall redox state of the cells rather than a quantitative estimate of the specific ROS. We agree with the reviewer on the conundrum posed by measurement of total ROS. Indeed, it is possible that even though the total ROS of two different PM samples is the same, but the concentrations of specific ROS, and the resulting health impacts caused by these ROS might be very different. This is a valid concern about the use of such comprehensive ROS probes, but we don't think that we can answer this question based on our study. This will require a simultaneous measurement of different ROS using different probes and their systematic comparison with either the toxicological or epidemiological endpoints, to understand the relative importance of these different ROS.

We also agree with the reviewer that DCFH-DA might be more sensitive to certain chemical species than others, which could influence the intrinsic OP results shown in Figure 6. However, the main focus of our present study is to develop an automated instrument which can imitate a well-established manual protocol for the cellular ROS measurement and demonstrate its application by measuring the intrinsic OP of various PM chemical species that can interact with the macrophages to generate ROS. Evaluating the nature and preferences of DCFH-DA to directly react with the chemical species is beyond the scope of this paper as that would require a more thorough investigation of the numerous molecular pathways of both deacetylation of DCFH-DA as well as the oxidation of DCFH (Burkitt and Wardman, 2001; Bonini et al., 2006, Hempel et al., 1999). Without such evaluation, we fear, any discussion on the specificity of DCFH-DA to chemical species will be speculative. However, we do intend to explore these relationships between DCFH-DA and PM chemical species in the near future. Nevertheless, based on the reviewer's suggestions, we have included the following brief discussion along these points in our manuscript on page 12, line 379-384:

*“Note, the ROS probe used in our study (DCFH-DA) does not measure the concentration of specific ROS (e.g., H<sub>2</sub>O<sub>2</sub>, OH $\cdot$ , ROO $\cdot$ ,  $\cdot$ O<sub>2</sub> $\cdot$ , etc.) separately, and therefore it is possible that despite*

*a similar OP of the PM<sub>2.5</sub> chemical species as measured by SCOPE, the concentrations of the specific ROS, and the resulting health impacts caused by these ROS might be very different. Moreover, the reactivity of DCFH-DA to interact directly with the PM chemical components is not explored. Future studies should include specific measurement of different ROS using specific probes along with total OP to better understand the relationship between different chemical species and their health impacts.”*

4. Line 21 of page 1: Show the full name of PAH please. Whether oxygenated PAH is more accurate here? It looks like parent PAH generally do not exhibit prominent OP.

#### Response

Full name of PAH has been added to Line 22. We agree with the reviewer that oxygenated products of the PAHs could be more OP-active than the parent PAHs, as also indicated in some of the studies (Gurbani et al., 2013; Sklorz et al., 2007; Wang et al., 2011). However, our focus here was to evaluate some of the most common and priority PAHs as defined by USEPA (Husar et al., 2012), which are known to be present in the ambient PM. We intend to explore more PAHs and the effect of oxidation in a more systematic way (e.g., in a oxidation flow reactor) in the future.

5. Line 41-43 of page 2: it is worthy to introduce the electron paramagnetic resonance (EPR) assay/method here.

#### Response

We thank the reviewer for this suggestion. We have added EPR assay in Line 44-45 on Page 2. “*and electro paramagnetic resonance (EPR) measurements (Dikalov et al., 2018; Jeong et al., 2016)*”.

6. Line 95-96: the ‘one week’ storing time is necessary? You may want to say use it up in one week or make fresh stocks each week.

#### Response

No, one week of storing time is not necessary. The structure of our sentence was not clear here. This sentence has been changed to “*The stock solutions of quinones (PQN, 1,2-NQN, 1,4-NQN) were prepared in DMSO, stored in a freezer at -20 °C and used within a week.*” On Page 4 Line 96 of the revised manuscript.

7. Line 166 of page 6: Why ‘2 h incubation’ is the best for measurement? In addition, for incubation of human macrophages, the mechanism and time period (much slower) for the metabolic processes are quite different. More discussions are needed to clarify the gap between murine alveolar cells and human alveolar cells.

#### Response

Before we determined the protocol for our automated instrument, we tested the kinetics of ROS generation for two randomly chosen PM samples from the sample set analyzed in our study, by measuring the ROS response at every half an hour till 3.5 hours. The results of this analysis have been included in the supplemental information (Fig. S3) of the revised manuscript and are

reproduced here (Fig. R3). As can be seen, the ROS response peaks and stabilizes at around 2-hour incubation time for both of the PM samples. Note, these results are consistent with Landreman et al., 2008, which also reported that for most samples (PM, blanks, positive control), the ROS response stabilize at around 2-hour incubation time. Therefore, we chose 2 hours of incubation time for our measurement.

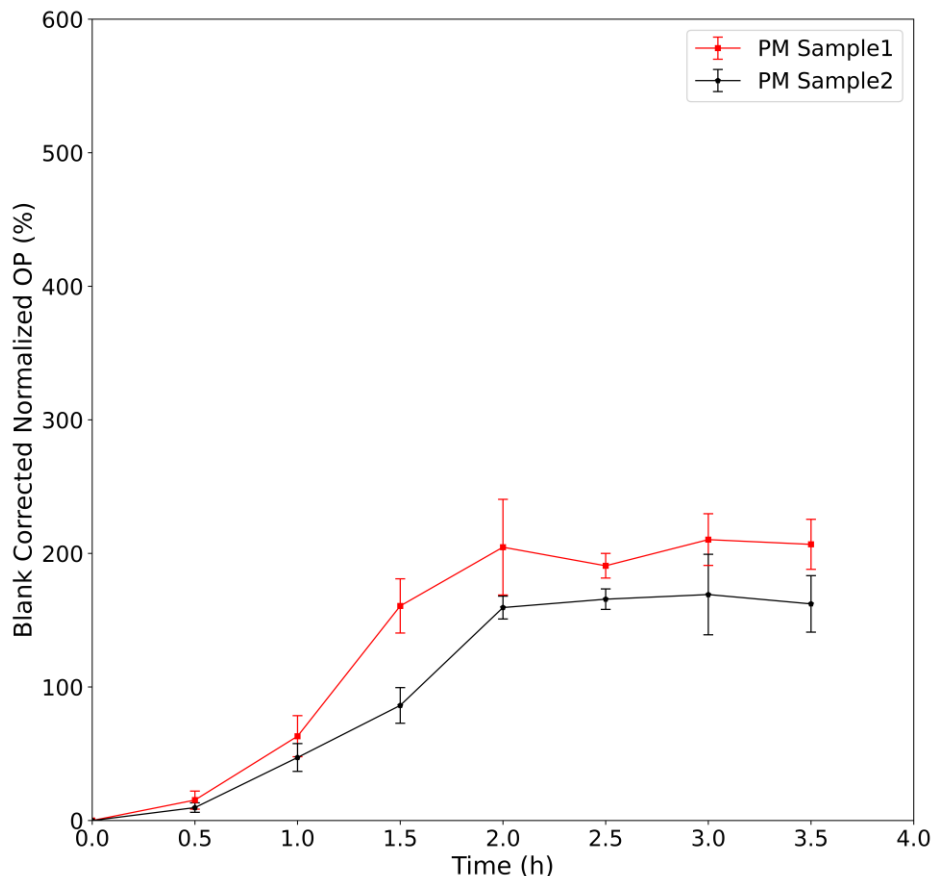

**Figure R3:** Effect of incubation time on the OP of PM samples. Each measurement was performed in triplicates. Error bars denote one standard deviation of the mean.

We have also added the following text in the revised manuscript on Page 5, Line 138-143:

*“The incubation time of 2 hours was chosen after measuring the kinetics of ROS generation for two PM samples (chosen randomly from the sample set analyzed in our study) at a time interval of 30 minutes over a 3.5 h time period (please refer to Fig. S3 in SI). It was found that the ROS response peaks and stabilizes at around 2-hour incubation time for both of the PM samples. These results are consistent with Landreman et al., (2008), which also reported that for most samples (PM, blanks, positive control), the ROS response stabilizes at around 2-hour incubation time.”*

We agree with the reviewer that metabolic processes in human cells could be quite different from those in murine cells and this could also be one of the reasons why PAHs showed much lower OP in our study. We have added the following sentences in the revised manuscript to clarify the gap between murine and human cells on Page 11, Line 350-354:

*“For example, it has been demonstrated that baseline esterase activities as well as secretion of cytochrome P450, which could markedly affect cellular metabolism, result in varied responses of murine and human cell lines to organic compounds (Veronesi and Ehrich, 1993). There is also a marked difference in the distribution of peroxisomal proteins (such as catalases) in human and mouse lung cells, which could be responsible for different ROS activity in both types of cells (Karnati and Baumgart-Vogt, 2008).*

8. Line 181-192 of page 6-7: Clarify whether the filters have been prebaked (condition) or not?

Response

All the filters were prebaked at 550 °C.

The following sentences has been added in the revised manuscript (Page 6, Line 174): *“All the filters were prebaked at 550 °C for 24 hours before sampling.”*

9. Line 194 on page 7: The impact of sonication on ROS formation should be mentioned.

Response

In our analysis, we found that ROS response of a blank filter extracted in DI by sonication was only slightly higher than that of DI (average ratio of blank filter to DI =  $1.17 \pm 0.02$ ; N= 20). Moreover, we always blank corrected the ROS response of a PM sample with that of the field blank filter. Therefore, any effect of sonication caused by the extraction of filter in DI should have been largely cancelled out. We have added following sentences in the revised manuscript on Page6, Line 185-198:

*“Although sonication could potentially lead to the formation of ROS (Miljevic et al., 2014), we found that ROS response of a blank filter extracted in DI by sonication was only slightly higher than that of DI (average ratio of blank filter to DI =  $1.17 \pm 0.02$ ; N= 20). Moreover, we always blank corrected the ROS response of a PM sample with that of the field blank filter. Therefore, any effect of sonication caused by the extraction of filter in water should have been largely cancelled out.”*

10. Line 197: What is the impact of fluorescent particle smaller than 0.45 µm in ambient particles to the measurement?

Response

This is a valid comment. Following the reviewer’s point, we conducted the experiments to quantify the impact of fluorescent particle smaller than 0.45 µm in the ambient PM. Specifically, we extracted 10 randomly chosen PM samples from the sample set analyzed in our study, extracted them in DI, filtered the extracts through a 0.45 µm syringe filter, and measured their fluorescence at the same wavelengths (excitation 488 nm/ emission 530 nm) as used for the DCF measurement. The difference between absolute fluorescence of the filtered extracts ( $0.52 \pm 0.04$  fluorescence units) and DI ( $0.47 \pm 0.1$  fluorescence units) was not statistically significant ( $p > 0.05$ ; unpaired t-test). Moreover, absolute fluorescence of the filtered PM extract was 60-80 times lower than that of a negative control (i.e., DI+cells+DCFH-DA). Therefore, we conclude that contribution of the fluorescent ambient particles smaller than 0.45 µm to the ROS measurement is negligible.

We have also added following text in the revised manuscript on Page 7, Line 189-195:

*“We also assessed the impact of fluorescent particle smaller than 0.45  $\mu\text{m}$  in our ambient PM extracts. Specifically, we extracted 10 randomly chosen PM samples from the sample set analyzed in our study, extracted them in DI, filtered the extracts through a 0.45  $\mu\text{m}$  syringe filter, and measured their fluorescence at the same wavelengths (excitation 488 nm/ emission 530 nm) as used for DCF. The difference between absolute fluorescence of the filtered extracts ( $0.52 \pm 0.04$  fluorescence units) and DI ( $0.47 \pm 0.1$  fluorescence units) was not statistically significant ( $p > 0.05$ ; unpaired *t*-test). The absolute fluorescence of the filtered PM extract was 60-80 times lower than that of a negative control. Thus, the contribution of fluorescent ambient particles smaller than 0.45  $\mu\text{m}$  to the ROS measurement is negligible.”*

11. Line 235: the ‘1’’ is confusing.

**Response**

*1’’* has been replaced with *1 inch.* (Page 9, Line 271).

12. Sections 2.2 and 2.4 can be merged to form one section. Section 3.3 and 3.4 can be merged to form one section. The current Section 2.6 can be the last subsection in Section 2.

**Response**

We thank the reviewer for this suggestion. We have merged these sections. We have also made the current Section 2.6 as the last subsection of Section 2 (Section 2.7).

### References cited in the response document

- Abe, K., and Saito, H: Characterization of t-butyl hydroperoxide toxicity in cultured rat cortical neurones and astrocytes, *Pharmacology and Toxicology*, 83(1), 40–46, <https://doi.org/10.1111/j.1600-0773.1998.tb01440.x>, 1998.
- Alía, M., Ramos, S., Mateos, R., Bravo, L. and Goya, L.: Response of the antioxidant defense system to tert-butyl hydroperoxide and hydrogen peroxide in a human hepatoma cell line (HepG2), *J. Biochem. Mol. Toxicol.*, 19(2), 119–128, <https://doi.org/10.1002/jbt.20061>, 2005.
- Arbogast, S., and Reid, M. B.: Oxidant activity in skeletal muscle fibers is influenced by temperature, CO<sub>2</sub> level, and muscle-derived nitric oxide, *Am. J. Physiol. Regul. Integr. Comp. Physiol.*, 287(4), 698-705, <https://doi.org/10.1152/ajpregu.00072.2004>, 2004.
- Bonini MG, Rota C, Tomasi A and Mason RP.: The oxidation of 2',7'-dichlorofluorescein to reactive oxygen species: a self-fulfilling prophesy? *Free Radic. Biol. Med.*, 40(6), 968–975, <https://doi.org/10.1016/j.freeradbiomed.2005.10.042>, 2006.
- Burkitt MJ and Wardman P.: Cytochrome c is a potent catalyst of dichlorofluorescein oxidation: implications for the role of reactive oxygen species in apoptosis, *Biochem. Biophys. Res. Commun.*, 282 (1), 329–333. <https://doi.org/10.1006/bbrc.2001.4578>, 2001.
- Chance, B., Sies, H., and Boveris, A.: Hydroperoxide metabolism in mammalian organ, *Physiol. Rev.*, 59(3), 527–605, <https://doi.org/10.1152/physrev.1979.59.3.527>, 1979.

Charrier, J. G., and Anastasio, C. (2012).: On dithiothreitol (DTT) as a measure of oxidative potential for ambient particles: Evidence for the importance of soluble \newline transition metals, *Atmos. Chem. Phys.*, 12(19), 9321–9333, <https://doi.org/10.5194/acp-12-9321-2012>, 2012.

Dierickx, P. J., Van Nuffel, G., and Alvarez, I.: Glutathione protection against hydrogen peroxide, tert-butyl hydroperoxide and diamide cytotoxicity in rat hepatoma-derived Fa32 cells, *Hum. Exp. Toxicol.*, 18(10), 627–633, <https://doi.org/10.1191/096032799678839482>, 1999.

Dikalov, S. I., Polienko, Y. F., & Kirilyuk, I.: Electron Paramagnetic Resonance Measurements of Reactive Oxygen Species by Cyclic Hydroxylamine Spin Probes, *Antioxid. Redox Signal.*, 28(15), 1433–1443, <https://doi.org/10.1089/ars.2017.7396>, 2018.

Guidarelli, A., Cattabeni, F., and Cantoni, O.: Alternative mechanisms for hydroperoxide-induced DNA single strand breakage, *Free Radic. Res.*, 26(6), 537–547, <https://doi.org/10.3109/10715769709097825>, 1997.

Gurbani, D., Bharti, S. K., Kumar, A., Pandey, A. K., Ana, G. R., Verma, A., Khan, A.H., Patel, D.K., Mudiam, M.K.R., Jain, S.K., Roy, R., and Dhawan, A.: Polycyclic aromatic hydrocarbons and their quinones modulate the metabolic profile and induce DNA damage in human alveolar and bronchiolar cells, *Int. J. Hyg. Environ. Health*, 216(5), 553–565, <https://doi.org/10.1016/j.ijheh.2013.04.001>, 2013.

Hempel SL, Buettner GR, O'Malley YQ, Wessels DA and Flaherty DM.: Dihydrofluorescein diacetate is superior for detecting intracellular oxidants: comparison with 2',7'-dichlorodihydrofluorescein diacetate, 5 (and 6)-carboxy-2',7'-dichlorodihydrofluorescein diacetate, and dihydrorhodamine, *Free Radic. Biol. Med.*, 27(1-2), 146–159, [https://doi.org/10.1016/s0891-5849\(99\)00061-1](https://doi.org/10.1016/s0891-5849(99)00061-1), 1999.

Hussar, E., Richards, S., Lin, Z. Q., Dixon, R. P., and Johnson, K. A.: Human health risk assessment of 16 priority polycyclic aromatic hydrocarbons in soils of Chattanooga, Tennessee, USA, *Water Air Soil Pollut.*, 223(9), 5535–5548, <https://dx.doi.org/10.1007%2Fs11270-012-1265-7>, 2012.

Ikeda, Y., Nakano, M., Ihara, H., Ito, R., Taniguchi, N., and Fujii, J.: Different consequences of reactions with hydrogen peroxide and t-butyl hydroperoxide in the hyperoxidative inactivation of rat peroxiredoxin-4, *J. Biochem.*, 149(4), 443–453, <https://doi.org/10.1093/jb/mvq156>, 2011.

Jeong, M. S., Yu, K. N., Chung, H. H., Park, S. J., Lee, A. Y., Song, M. R., Cho, M. H., and Kim, J. S.: Methodological considerations of electron spin resonance spin trapping techniques for measuring reactive oxygen species generated from metal oxide nanomaterials, *Sci. Rep.*, 6(February), 1–10, <https://doi.org/10.1038/srep26347>, 2016.

Keston, A. S., and Brandt, R.: The fluorometric analysis of ultramicro quantities of hydrogen peroxide, *Anal. Biochem.*, 11(1), 1–5, [https://doi.org/10.1016/0003-2697\(65\)90034-5](https://doi.org/10.1016/0003-2697(65)90034-5), 1965.

Landreman, A. P., Shafer, M. M., Hemming, J. C., Hannigan, M. P., and Schauer, J. J.: A macrophage-based method for the assessment of the reactive oxygen species (ROS) activity of atmospheric particulate matter (PM) and application to routine (daily-24 h) aerosol monitoring studies, *Aerosol Sci Technol.*, 42(11), 946–957, <https://doi.org/10.1080/02786820802363819>, 2008.

Lane, K. B., Egan, B., Vick, S., Abdolrasulnia, R., and Shepherd, V. L.: Characterization of a rat alveolar macrophage cell line that expresses a functional mannose receptor, *J. Leukoc. Biol.*, 64(3), 345–350, <https://doi.org/10.1002/jlb.64.3.345>, 1998.

Lin, T. J., Hirji, N., Stenton, G. R., Gilchrist, M., Grill, B. J., Schreiber, A. D., and Befus, A. D.: Activation of macrophage CD8: pharmacological studies of TNF and IL-1 $\beta$  production, *J. Immunol.*, 164(4), 1783–1792, <https://doi.org/10.4049/jimmunol.164.4.1783>, 2000.

Miljevic, B., Hedayat, F., Stevanovic, S., Fairfull-Smith, K. E., Bottle, S. E., and Ristovski, Z. D.: To sonicate or not to sonicate PM filters: Reactive oxygen species generation upon ultrasonic irradiation, *Aerosol Sci. Tech.*, 48(12), 1276–1284, <https://doi.org/10.1080/02786826.2014.981330>, 2014.

Reiniers, M. J., Van Golen, R. F., Bonnet, S., Broekgaarden, M., Van Gulik, T. M., Egmond, M. R., and Heger, M.: Preparation and Practical Applications of 2',7'-Dichlorodihydrofluorescein in Redox Assays, *Anal. Chem.*, 89(7), 3853–3857, <https://doi.org/10.1021/acs.analchem.7b00043>, 2017.

Slamenova, D., Kozics, K., Hunakova, L., Melusova, M., Navarova, J., and Horvathova, E.: (2013). Comparison of biological processes induced in HepG2 cells by tert-butyl hydroperoxide (t-BHP) and hydroperoxide (H<sub>2</sub>O<sub>2</sub>): The influence of carvacrol, *Mutat. Res. Genet. Toxicol. Environ. Mutagen*, 757(1), 15–22, <https://doi.org/10.1016/j.mrgentox.2013.03.014>, 2013.

Sklorz, M., Briedé, J. J., Schnelle-Kreis, J., Liu, Y., Cyrus, J., de Kok, T. M., and Zimmermann, R.: Concentration of oxygenated polycyclic aromatic hydrocarbons and oxygen free radical formation from urban particulate matter, *J. Toxicol. Environ. Health Part A*, 70(21), 1866-1869, <https://doi.org/10.1080/15287390701457654>, 2007.

Wang, W., Jariyasopit, N., Schrlau, J., Jia, Y., Tao, S., Yu, T. W., Dashwood, H. R., Zhang, W., Wang, X., and Simonich, S. L. M.: Concentration and photochemistry of PAHs, NPAHs, and OPAHs and toxicity of PM<sub>2.5</sub> during the Beijing Olympic Games, *Environ. Sci. Technol.*, 45(16), 6887-6895, <https://doi.org/10.1021/es201443z>, 2011.



1  
2  
3  
4  
5  
6  
7  
8  
9  
10  
11  
12  
13  
14  
15  
16  
17  
18  
19  
20  
21  
22  
23  
24  
25  
26  
27  
28  
29  
30  
31  
32  
33  
34  
35  
36  
37

## Appendix: Revised manuscript in track mode

# A Semi-automated Instrument for Cellular Oxidative Potential Evaluation (SCOPE) of Water-soluble Extracts of Ambient Particulate Matter

Sudheer Salana, Yixiang Wang, Joseph V. Puthussery, Vishal Verma

Department of Civil and Environmental Engineering, University of Illinois at Urbana-Champaign, Urbana, 61801, USA

*Correspondence to:* Vishal Verma (vverma@illinois.edu)

**Abstract.** Several automated instruments exist to measure the acellular oxidative potential (OP) of ambient particulate matter (PM). However, cellular OP of the ambient PM is still measured manually, which severely limits the comparison between two types of assays. Cellular assays could provide a more comprehensive assessment of the PM-induced oxidative stress, as they incorporate more biological processes involved in the PM-catalyzed reactive oxygen species (ROS) generation. Considering this need, we developed a first of its kind semi-automated instrument for measuring the cellular OP based on a macrophage ROS assay using rat alveolar macrophages. The instrument named SCOPE - Semi-automated instrument for Cellular Oxidative Potential Evaluation, uses dichlorofluorescein diacetate (DCFH-DA) as a probe to detect the OP of PM samples extracted in water. SCOPE is capable of analyzing a batch of six samples (including one negative and one positive control) in five hours and is equipped to operate continuously for 24-hours with minimal manual intervention after every batch of analysis, i.e., after every five hours. SCOPE has a high analytical precision as assessed from both positive controls and ambient PM samples (CoV <17%). The results obtained from the instrument were in good agreement with manual measurements using tert-Butyl hydroperoxide (t-BOOH) as the positive control (slope = 0.83 for automated vs. manual,  $R^2 = 0.99$ ) and ambient samples (slope = 0.83,  $R^2 = 0.71$ ). We further demonstrated the ability of SCOPE to analyze a large number of both ambient and laboratory samples, and developed a dataset on the intrinsic cellular OP of several compounds, such as metals, quinones, [polycyclic aromatic hydrocarbons \(PAHs\)](#) and inorganic salts, commonly known to be present in ambient PM. This dataset is potentially useful in future studies to apportion the contribution of key chemical species in the overall cellular OP of ambient PM.

## 1 Introduction

Epidemiological models have traditionally relied on mass of the particulate matter (PM) as a metric to associate the health effects such as wheeze (Doiron et al., 2017; Karakatsani et al., 2012), asthma (Holm et al., 2018; Wu et al., 2019; Zmirou et al., 2002), myocardial infarction and coronary heart disease (Yang et al., 2019), ischemic heart disease and dysrhythmias (Pope et al., 2004) and heart rate variability (Breitner et al., 2019; Pieters et al., 2012; Riojas-Rodriguez et al., 2006) with the inhalation of ambient and indoor PM. However, mass is not a wholesome metric as it does not capture the diverse range of particle physicochemical characteristics. Apparently, the assumption that an

38 increase in PM mass alone leads to a proportionate increase in the mortality would yield erroneous estimates if we do  
39 not account for the complexity of PM chemical composition and the resulting intrinsic toxicities. There are also  
40 mounting evidence that toxic effects of different chemical components are not simply additive, but there exists both  
41 synergistic and antagonistic interactions (Wang et al., 2020; Yu et al., 2018). Therefore, we need a metric of the PM  
42 along with mass that can provide some relevant information to assess its toxicity. Oxidative stress has emerged as one  
43 of such metrics, which has been identified as a crucial step in the progression of many human diseases.

44 Oxidative stress is caused by an imbalance between reactive oxygen species (ROS) generation and their subsequent  
45 scavenging by lung antioxidants (Kryston et al., 2011; Li et al., 2008; Møller et al., 2010; Rao et al., 2018; Reuter et  
46 al., 2010). Thus, measuring the ability of PM to induce ROS generation in the respiratory system, also called the  
47 oxidative potential (OP), could be considered as one of the markers of its toxicity and accordingly several acellular  
48 assays have been developed in the recent past to measure the OP of PM. These include the dithiothreitol (DTT) assay  
49 (Charrier and Anastasio 2012; Fang et al., 2015), ascorbic acid (AA) assay (Künzli et al., 2006; Visentin et al., 2016),  
50 glutathione assay (Künzli et al., 2006; Mudway et al., 2005), ~~and~~ hydroxyl radical ( $\bullet$ OH) ~~measurement~~ (Vidrio et al.,  
51 2009; Xiong et al., 2017) and electro paramagnetic resonance (EPR) measurements (Dikalov et al., 2018; Jeong et al.,  
52 2016). Along the similar lines, several cellular assays have also been developed, which involve molecular probes that  
53 can detect ROS through their transformation from non-fluorescent to fluorescent forms (Dikalov and Harrison 2014;  
54 Kuznetsov et al., 2011; Landreman et al., 2008; Wan et al., 1993). However, measurement of OP of PM using both  
55 cellular and acellular assays is often a labor-intensive and time-consuming process and therefore manually analyzing  
56 a large number of ambient samples for spatiotemporal resolution of OP is a cumbersome process.

57 In the last few years, a number of automated instruments have been developed based on acellular assays which could  
58 provide rapid and high-throughput analyses of the PM chemical OP (Berg et al., 2020; Fang et al., 2015; Gao et al.,  
59 2017; Venkatachari and Hopke 2008). There have also been a number of online instruments which can be deployed  
60 in the field making it possible to collect real-time OP or ROS data (Brown et al., 2019; Huang et al., 2016; Puthussery  
61 et al., 2018; Sameenoi et al., 2012; Wragg et al., 2016; Zhou et al., 2018). Although, acellular assays have many  
62 advantages over cellular assays such as ease of application, low maintenance and no risk of microbial contamination,  
63 they are unable to capture the complex biochemical reactions occurring in a biological system as a response to PM  
64 exposure. This could be one of the reasons for their inconsistent correlations with various biological responses such  
65 as DNA damage and expression of inflammatory cytokines in previous studies (Crobeddu et al., 2017; Janssen et al.,  
66 2015; Øvrevik 2019; Steenhof et al., 2011). Cellular assays have an edge in this regard as these assays directly expose  
67 biological cells to chemical constituents of the particles, thus capturing some, if not all, of the biochemical processes  
68 related to the oxidative burst. However, to the best of our knowledge, no automated instrument has ever been  
69 developed to provide a rapid high-throughput analysis of the cellular OP induced by the ambient PM. In comparison  
70 to chemical assays, cellular assays are even more time and labor-intensive. Due to this strenuous nature of the cellular  
71 protocols, there have been very limited comparison between the chemical and cellular OP measurements. There is a  
72 need for the development of an automated instrument for the cell-based measurement of OP, which could not only  
73 analyze a large number of samples in shorter period with minimal manual intervention, but could also open up the

74 possibilities for developing a field-deployable real-time instrument measuring cellular OP. Having such an automated  
75 instrument would be able to provide a direct comparison of cellular and acellular assays, thus screening the important  
76 chemical OP endpoints. Such advances will also help in integrating the OP data in toxicological and/or  
77 epidemiological studies by yielding a relatively large dataset on these measurements.

78 In this paper, we describe the development of a semi-automated instrument for cellular oxidative potential evaluation  
79 (SCOPE). SCOPE is the first of its kind instrument to measure the cellular OP induced by the water-soluble ambient  
80 PM extracts in murine alveolar cell line NR8383, using an automated protocol. The instrument is capable of analyzing  
81 a batch of six samples (including one negative and one positive control) in five hours. SCOPE is equipped to operate  
82 continuously for 24-hours with minimal manual intervention after every batch of analysis, i.e., after every five hours.  
83 We also calculated the detection limit of this instrument and evaluated its performance by measuring precision and  
84 accuracy using both positive controls and ambient samples. Finally, we demonstrated the ability of SCOPE to analyze  
85 a large number of both ambient and laboratory samples, and developed a dataset on the intrinsic cellular OP of several  
86 compounds, such as metals, quinones, polycyclic aromatic hydrocarbons (PAHs) and inorganic salts, commonly  
87 known to be present in the ambient PM.

## 88 **2 Materials and Methods**

### 89 **2.1 Chemicals**

90 Copper (II) sulphate pentahydrate [Cu (II)] ( $\geq 98\%$ ), Luperox® TBH70X, tert-Butyl hydro peroxide (t-BOOH)  
91 solution (70 wt. % in water), iron (II) sulphate heptahydrate [Fe(II)] ( $\geq 99\%$ ), manganese (II) chloride tetrahydrate  
92 [Mn(II)] ( $\geq 98\%$ ), zinc (II) nitrate hexahydrate [Zn(II)] ( $\geq 98\%$ ), iron (III) chloride hexahydrate [Fe(III)] ( $\geq 97\%$ ), lead  
93 (II) acetate trihydrate [Pb(II)] ( $\geq 98\%$ ), aluminum (III) nitrate nonahydrate [Al(III)] ( $\geq 98\%$ ), chromium(III) nitrate  
94 nonahydrate [Cr(III)] ( $\geq 97\%$ ), cadmium (II) nitrate tetrahydrate [Cd(II)] ( $\geq 98\%$ ), vanadium (III) chloride V(III)  
95 (97%), nickel (II) chloride hexahydrate [Ni(II)] (99.9%), 9,10-phenanthraquinone (PQN) (99%), 1,2-naphthaquinone  
96 (1,2-NQN) (97%), 1,4-naphthaquinone (1,4-NQN) (97%), 5-hydroxyl-1,4-naphthaquinone (5-H-1,4-NQN) (97%),  
97 pyrene (Pyr) (98%), naphthalene (Naph) (99%), anthracene (Anth) (97%), phenanthrene (Phen) (98%),  
98 benzo[a]pyrene (B[a]P) ( $\geq 96\%$ ), fluorene (Flu) (98%), benz[a]anthracene (B[a]A) (99%), sodium chloride (NaCl)  
99 ( $\geq 99\%$ ), ammonium nitrate ( $\text{NH}_4\text{NO}_3$ ) ( $\geq 99\%$ ), 2',7'-dichlorofluorescein diacetate (DCFH-DA), zymosan A from  
100 *saccharomyces cerevisiae*, Ham's F-12K growth media, and fetal bovine serum (FBS) were purchased from Sigma  
101 Aldrich Co. (St. Louis, MO). Ammonium chloride ( $\text{NH}_4\text{Cl}$ ) and calcium chloride ( $\text{CaCl}_2$ ) were purchased from VWR  
102 Life Sciences. Ammonium sulphate ( $\text{NH}_4\text{SO}_4$ ) and potassium chloride (KCl) were purchased from Fisher Scientific.  
103 Salt glucose media (SGM) at two different concentrations (1X and 10X), which was prepared according to the  
104 composition discussed in Klein et al., (2002), was provided by the Cell Media Facility at UIUC.

### 105 **2.2 Stock Solution Preparation**

106 The stock solutions of quinones (PQN, 1,2-NQN, 1,4-NQN) were prepared in DMSO and stored in a  
107 freezer at -20 °C for one week. The stock solutions of quinones (PQN, 1,2-NQN and 1,4-NQN) were

108 prepared in DMSO, stored in a freezer at -20 °C and used within a week. The stock solution of 5-H-1,4-  
109 NQN was prepared on the same day of the experiment as it was found to be relatively unstable (e.g.,  
110 change in color over a period of more than 24 hours) compared to other quinones. The stock solutions  
111 of PAHs (anthracene, pyrene, naphthalene, fluorene, phenanthrene, Ba[A]P, and Ba[A]A) were prepared  
112 in methanol, ~~and~~ stored in a freezer at -20 °C and used within a ~~for one~~ week. On the day of the  
113 experiment, the stock solutions of both quinones and PAHs were diluted using Milli-Q deionized water  
114 (DI, resistivity = 18.2 MΩ/cm) to appropriate concentrations. A 45 mM stock solution of DCFH-DA was  
115 prepared and aliquoted into different vials (30 μL per vial). These vials were stored in a freezer (at -20  
116 °C) and used within a month. To prepare the final probe solution, a portion of the content of one vial  
117 (i.e., 25 μL of 45 mM DCFH-DA) was diluted 100 times just before the experiment, using 10X SGM. All  
118 the metals, inorganic salt and t-BOOH solutions were freshly prepared using DI on the day of the  
119 experiments and immediately used.

## 120 2.3 Cells

121 Alveolar macrophages form the front-line of defense in pulmonary region of respiratory system against  
122 attack by the foreign particles. These cells play a major role in preliminary responses such as  
123 phagocytosis, secreting pro-inflammatory cytokines and killing pathogens. We have used a murine cell  
124 line, NR8383, as it is one of the most widely used cell lines in the PM studies. Certain characteristics of  
125 this cell line make it one of the best macrophage models available for the evaluation of PM OP. These  
126 characteristics include minimal maintenance (can be studied in a BSL-1 lab) and highly reproducible  
127 results that are comparable to primary cells (Helmke et al., 1988). NR8383 also expresses a number of  
128 inflammatory cytokines such as IL-1β and TNF-α (Lin et al., 2000), thus it will allow us to link the results  
129 obtained from this instrument to these inflammatory responses, in our future studies. We used a murine  
130 alveolar cell line, NR8383, which resembles greatly to the primary macrophages in terms of their  
131 expression of cytokines and other biological responses, thus serving as a good model for the PM toxicity  
132 studies (Lane et al., 1998; Lin et al., 2000). The cells were maintained on glass culture plates in Ham's  
133 F12-K medium containing 5% FBS and incubated at 37 °C with 5 % CO<sub>2</sub> concentration. The cells were  
134 cultured by transferring floating cells from culture plates to fresh plates every four weeks. The cells  
135 generally divide and double in concentration within 48 hours (Helmke et al., 1987), after which the  
136 floating cells are removed for further growth of the attached cells by adding fresh media. Since Ham's F-  
137 12K media could itself contribute to the fluorescence, it was replaced by 1X\_SGM after counting the  
138 initial cell density and subsequent centrifugation, such that final concentration of the cells in SGM is  
139 2000 cells/μL.

140

141 Before designing the protocol of our instrument, we conducted an experiment by keeping the cells  
142 outside an incubator but in a temperature-controlled environment (i.e., 37 °C maintained through a  
143 thermomixer used in our instrument) and measured the cell viability using trypan blue [see Fig. S1 in the  
144 supplementary information (SI)]. We found that over a period of 5 hours, the cell viability decreased by  
145 only 6%. However, the cell viability started decreasing sharply beyond 6 hours. Therefore, we limited the  
146 cells exposure to the outside environment for only five hours.

## 147 **2.4 Probe Preparation**

148 ~~A 45 mM stock solution of DCFH-DA was prepared and aliquoted into different vials (30 µL per vial).  
149 These vials were stored in a freezer (at -20 °C) and used within a month. To prepare the final probe  
150 solution, a portion of the content of one vial (i.e., 25 µL of 45 mM DCFH-DA) was diluted 100 times just  
151 before the experiment, using 10X SGM.~~

## 152 **2.5.4 System Setup**

153 We adapted the method of macrophage ROS assay from Landreman et al., (2008) which is the most  
154 widely used protocol for measuring the cellular OP of ambient PM. In this assay, DCFH-DA is used as an  
155 ROS probe. The reaction mechanism of DCFH-DA with ROS is well established (Rosenkranz et al., 1992;  
156 Wan et al., 1993). Briefly, DCFH-DA is a cell permeable compound which undergoes deacetylation by  
157 intracellular esterase to form DCFH. DCFH is oxidized by a variety of ROS to form a fluorescent product  
158 called DCF. The intensity of fluorescence provides a direct measure of the ROS generation. We  
159 measured the variation in absolute fluorescence of DCFH-DA as a function of time to assess the possible  
160 degradation or autooxidation of DCFH-DA during our measurement. The results showed that the  
161 absolute fluorescence of DCFH-DA remains constant for a period of at least 6 hours, indicating the  
162 stability of the probe within our experimental timeframe (please refer to Fig. S2 in SI). In our protocol,  
163 all the components of the assay, i.e., ~~sample PM extract (or negative control/positive control);~~ 138 µL),  
164 molecular probe (DCFH-DA; 39 µL), and cells suspension (177 µL at a final concentration of 1000 cells  
165 per µL in the reaction vial (RV)) are added together and incubated for 2 hours. Next, a small aliquot is  
166 withdrawn and transferred to a spectrofluorometer after dilution to measure the fluorescence. The  
167 incubation time of 2 hours was chosen after measuring the kinetics of ROS generation for two PM  
168 samples (chosen randomly from the sample set analyzed in our study) at a time interval of 30 minutes  
169 over a 3.5 h time period (please refer to Fig. S3 in SI). It was found that the ROS response peaks and  
170 stabilizes at around 2-hour incubation time for both of the PM samples. These results are consistent  
171 with Landreman et al., (2008), which also reported that for most samples (PM, blanks, positive control),  
172 the ROS response stabilized at around 2-hour incubation time.

173

174 The schematic diagram of SCOPE based on this protocol is shown in Fig. 1. The instrument consists of  
175 four major units: cells reservoir and samples holder, fluid transfer unit, incubation-cum-reaction unit,  
176 and measurement unit. The cells reservoir and sample holder consist of a set of seven vials (15 mL each)  
177 – one containing NR8383 cells suspended in 1X\_SGM, one amber vial containing DCFH-DA solution, five  
178 vials containing samples (i.e., four PM samples and one positive control). All the vials of this unit were  
179 placed in an Eppendorf Thermo-Mixer (Eppendorf North America, Hauppauge, NY, USA), which is  
180 maintained at 37 °C while continuously shaking at a frequency of 600 RPM. The fluid transfer unit  
181 consists of three Kloehn programmable syringe pumps (IMI precision, Littleton, CO, USA) (Pump #1, 2,  
182 and 3; see Fig. 1) and a 14-port multi-position valve (VICI® Valco Instrument Co. Inc., Houston, TX, USA)  
183 connected to Pump #2. The incubation-cum-reaction unit consists of 17 RVs [amber vials, 2 mL each; 1  
184 for negative control (i.e., the cells treated with DIDD) in triplicate, 1 for positive control (t-BOOH) in  
185 duplicates and 4 for PM samples in triplicates] held in another Eppendorf Thermo-Mixer which is  
186 maintained at 37 °C and continuously shaking at a frequency of 800 RPM to keep the contents of all the  
187 vials well-mixed and suspended. 14 of these RVs are connected to Pump # 2 through the multi-position

188 valve. Each RV connected to the multi-position valve is accessed by changing the valve position [using a  
189 valve actuator (VICI®)] to its respective number. Since multi-position valve has only 14 ports, rest 3 RVs  
190 are directly connected to Pump #3. Both of these pumps (i.e., #2 and 3) transfer the content from  
191 various reservoirs (e.g., cells, DI and DCFH-DA) to RVs, and also transfer a small aliquot from these RVs  
192 (50  $\mu$ L from each RV) to the measurement vial (MV) after 2 hours of reaction. Finally, the measurement  
193 unit consists of a Fluoromax-4 spectrofluorometer (Horiba Scientific, Edison, NJ, USA) equipped with a  
194 Flowcell (Horiba Scientific, HPLC Flowcell- 25  $\mu$ L volume) to measure the fluorescence generated from  
195 the reaction of DCFH and cellular ROS. Pump #1, which is connected to the MV and the  
196 spectrofluorometer, first dilutes the aliquot withdrawn from the RV and then transfers this diluted  
197 mixture from MV to the spectrofluorometer for fluorescence measurement.

## 198 ~~2.6OP Measurement Protocol~~

199 ~~The protocol for measuring cellular ROS activity involves two stages—the first stage consists of manual~~  
200 ~~preparation of the cells, DCFH-DA probe, and PM extracts, while the second stage involves incubating~~  
201 ~~the cells with PM and DCFH and measuring the fluorescence in an automated manner. After preparing~~  
202 ~~the cells, DCFH-DA and different PM extracts (i.e., completion of first stage), all the vials are manually~~  
203 ~~transferred to the cell reservoir and sample holder. The second stage (automation stage) further~~  
204 ~~consists of two phases—reaction phase and measurement phase. The complete algorithm of 2nd stage~~  
205 ~~is shown in Fig. 2. In the reaction phase, various reactants (i.e., cells, DCFH-DA and PM extract or~~  
206 ~~positive control of DI) are transferred from their respective reservoirs to the RVs using pump # 2 and 3.~~  
207 ~~This is done in a sequence of steps: in the first step, 138  $\mu$ L of DI is withdrawn using Pump #2 and~~  
208 ~~transferred via the multi-position valve to three RVs marked for negative control (i.e., triplicate analysis~~  
209 ~~of the negative control). In the second step, 177  $\mu$ L cell solution is withdrawn from the cell reservoir~~  
210 ~~using Pump # 2 and transferred sequentially to all 14 RVs via multi-position valve. Simultaneous to this~~  
211 ~~step, 177  $\mu$ L cell solution is withdrawn from the cell reservoir using Pump # 3 and transferred to three~~  
212 ~~RVs connected to that pump. In the third step, 39  $\mu$ L DCFH-DA is transferred using pump #2 and pump~~  
213 ~~#3 to the respective RVs connected to them (i.e., 14 RVs connected to pump #2 through the multi-~~  
214 ~~position valve and 3 RVs directly connected to pump #3) following the same sequential order as for~~  
215 ~~addition of the cell solution. Finally, 138  $\mu$ L of positive control (t-BOOH) and PM extracts are transferred~~  
216 ~~to the respective RVs using Pump #2 and # 3, i.e., t-BOOH and 3 PM extracts are transferred using Pump~~  
217 ~~# 2 via multi-position valve, while one PM extract using Pump # 3 directly connected to 3 RVs. After all~~  
218 ~~the RVs are loaded with the reactants, SCOPE performs a single round of self-cleaning, in which all the~~  
219 ~~valves and tubing of the instrument are rinsed with DI using the fluid handling unit (i.e., all three Kloehn~~  
220 ~~pumps).~~

221 ~~After 2 hours of cells' exposure to PM, the measurement phase starts in which the fluorescence of DCF~~  
222 ~~formed in each RV is measured in a sequential manner. Each measurement involves three steps—1)~~  
223 ~~withdrawing an aliquot of 50  $\mu$ L from the RV (using Pump #2 for 14 RVs connected to it, and Pump #3 for~~  
224 ~~the remaining 3 RVs) and transferring it to the MV; 2) diluting the aliquot 100 times by adding DI using~~  
225 ~~Pump #1 to the MV, and finally 3) pushing the diluted aliquot through Flowcell of the~~  
226 ~~spectrofluorometer using the same syringe Pump #1. The withdrawal of the aliquot from different RVs~~  
227 ~~follows the same order as for their preparation, such that the cells in each vial undergo exposure to the~~  
228 ~~PM extract or DI or t-BOOH for exactly 2 hours. The spectrofluorometer is preset at an~~  
229 ~~excitation/emission wavelength of 488 nm/530 nm. Between successive fluorescence measurements of~~

230 different RVs, the Flowcell, MV and the tubing connected to the multi-position valve are thoroughly  
231 rinsed with at least 10 mL of DI. After all RVs are measured for fluorescence, the instrument performs a  
232 final round of thorough self-cleaning, wherein each valve and tubing are cleaned (three times) with 70%  
233 ethanol followed by DI. All the RVs and MV after this cleaning step are disposed and replaced manually  
234 with clean empty vials. SCOPE takes about five hours for complete analysis of one batch of six samples  
235 (i.e., 4 PM extracts, one negative and one positive control). For the next batch of analysis, cells, DCFH-  
236 DA and samples are manually replaced with freshly prepared vials. In our experiments for this  
237 manuscript, one batch was run per day, although it is possible to run up to three batches (a total of  
238 twelve PM samples) per day.

## 239 **2.7-5 Ambient PM Sample Collection and Preparation**

240 Ambient PM<sub>2.5</sub> samples were used in this study for assessing the precision and accuracy of SCOPE. These  
241 ambient samples were collected as a part of the Midwest Sampling Campaign and the sampling  
242 procedure and collection protocol are described elsewhere (Yu et al., 2019). Briefly, PM<sub>2.5</sub> samples were  
243 collected on quartz filters (Pall Tissuquartz TM, 8"x10") using a high-volume sampler (flow rate of 1.13  
244 m<sup>3</sup>/min; PM<sub>2.5</sub> inlets, Tisch Environmental; Cleves, OH) from five different sites in the midwestern USA: a  
245 road-side site in Champaign (within the UIUC campus), a rural site in Bondville (IL), and three urban sites  
246 in Chicago, IL (university campus of Illinois Institute of Technology), Indianapolis, IN (Indiana University-  
247 Purdue University campus), and St. Louis, MO [a part of National Core Pollutants (NCore) Network of  
248 USEPA]. All the filters were prebaked at 550 °C for 24 hours before sampling. All the samples used in this  
249 study were collected between May 2018 and May 2019. A total of 50 samples from all the five sites (10  
250 from Indianapolis, 9 from Chicago, 10 from St. Louis, 7 from Bondville and 14 from Champaign) were  
251 used for conducting the performance evaluation, i.e., assessing precision and accuracy of the  
252 instrument. Further details on these samples (i.e., dates of collection, exact mass loadings etc.) are  
253 provided in Table S1 of the S1supplemental information (SI).

## 254 **2.8-6 Filters Extraction**

255 A single circular section of 1 inch<sup>1</sup> diameter was punched from the high-volume filter, immersed in DI  
256 and sonicated for 60 minutes in an ultrasonic water bath (Cole-Palmer, Vernon-Hills, IL, USA). The  
257 volume of DI was determined based on the PM<sub>2.5</sub> mass loading on each punched section, such that the  
258 final concentration of the extract for exposure in the RV is 30 µg/mL. After sonication, the extracts were  
259 passed through a 0.45 µm pore size polytetrafluoroethylene (PTFE) filter to remove any insoluble  
260 particles and/or filter fibers. The water-soluble PM<sub>2.5</sub> extracts were then used to measure the OP of the  
261 PM. Although sonication could potentially lead to the formation of ROS (Miljevic et al., 2014), we found  
262 that ROS response of a blank filter extracted in DI by sonication was only slightly higher than that of DI  
263 (average ratio of blank filter to DI = 1.17 ± 0.02; N= 20). Moreover, we always blank corrected the ROS  
264 response of a PM sample with that of the field blank filter. Therefore, any effect of sonication caused by  
265 the extraction of filter in water should have been largely cancelled out. We also assessed the impact of  
266 fluorescent particle smaller than 0.45 µm in our ambient PM. Specifically, we extracted 10 randomly  
267 chosen PM samples from the sample set analyzed in our study, extracted them in DI, filtered the  
268 extracts through a 0.45 µm syringe filter, and measured their fluorescence at the same wavelengths  
269 (excitation 488 nm/ emission 530 nm) as used for DCF. The difference between absolute fluorescence of  
270 the filtered extracts (0.52 ± 0.04 fluorescence units) and DI (0.47 ± 0.1 fluorescence units) was not

271 statistically significant ( $p > 0.05$ ; unpaired t-test). The absolute fluorescence of the filtered PM extract  
272 was 60-80 times lower than that of a negative control. Thus, the contribution of fluorescent ambient  
273 particles smaller than 0.45  $\mu\text{m}$  to the ROS measurement is negligible.

## 274 **2.7 OP Measurement Protocol**

275 The protocol for measuring cellular OP involves two stages –the first stage consists of manual  
276 preparation of the cells, DCFH-DA probe, and PM extracts, while the second stage involves incubating  
277 the cells with PM and DCFH and measuring the fluorescence in an automated manner. After preparing  
278 the cells, DCFH-DA and different PM extracts (i.e., completion of first stage), all the vials are manually  
279 transferred to the cell reservoir and sample holder. The second stage (automation stage) further  
280 consists of two phases – reaction phase and measurement phase. The complete algorithm of 2nd stage  
281 is shown in Fig. 2. In the reaction phase, various reactants (i.e., cells, DCFH-DA and PM extract or  
282 positive control of DI) are transferred from their respective reservoirs to the RVs using pump # 2 and 3.  
283 This is done in a sequence of steps: in the first step, 138  $\mu\text{L}$  of DI is withdrawn using Pump #2 and  
284 transferred via the multi-position valve to three RVs marked for negative control (i.e., triplicate analysis  
285 of the negative control). In the second step, 177  $\mu\text{L}$  cell solution is withdrawn from the cell reservoir  
286 using Pump # 2 and transferred sequentially to all 14 RVs via multi-position valve. Simultaneous to this  
287 step, 177  $\mu\text{L}$  cell solution is withdrawn from the cell reservoir using Pump # 3 and transferred to three  
288 RVs connected to that pump. In the third step, 39  $\mu\text{L}$  DCFH-DA is transferred using pump #2 and pump  
289 #3 to the respective RVs connected to them (i.e., 14 RVs connected to pump #2 through the multi-  
290 position valve and 3 RVs directly connected to pump #3) following the same sequential order as for  
291 addition of the cell solution. Finally, 138  $\mu\text{L}$  of positive control (t-BOOH) and PM extracts are transferred  
292 to the respective RVs using Pump #2 and # 3, i.e., t-BOOH and 3 PM extracts are transferred using Pump  
293 # 2 via multi-position valve, while one PM extract using Pump # 3 directly connected to 3 RVs. After all  
294 the RVs are loaded with the reactants, SCOPE performs a single round of self-cleaning, in which all the  
295 valves and tubing of the instrument are rinsed with DI using the fluid handling unit (i.e., all three Kloehn  
296 pumps).

297

298 After 2 hours of cells' exposure to PM, the measurement phase starts in which the fluorescence of DCF  
299 formed in each RV is measured in a sequential manner. Each measurement involves three steps- 1)  
300 withdrawing an aliquot of 50  $\mu\text{L}$  from the RV (using Pump #2 for 14 RVs connected to it, and Pump #3 for  
301 the remaining 3 RVs) and transferring it to the MV; 2) diluting the aliquot 100 times by adding DI using  
302 Pump #1 to the MV, and finally 3) pushing the diluted aliquot through Flowcell of the  
303 spectrofluorometer using the same syringe Pump #1. The withdrawal of the aliquot from different RVs  
304 follows the same order as for their preparation, such that the cells in each vial undergo exposure to the  
305 PM extract or DI or t-BOOH for exactly 2 hours. The spectrofluorometer is preset at an  
306 excitation/emission wavelength of 488 nm/530 nm. Between successive fluorescence measurements of  
307 different RVs, the Flowcell, MV and the tubing connected to the multi-position valve are thoroughly  
308 rinsed with at least 10 mL of DI. After all RVs are measured for fluorescence, the instrument performs a  
309 final round of thorough self-cleaning, wherein each valve and tubing are cleaned (three times) with 70%  
310 ethanol followed by DI. All the RVs and MV after this cleaning step are disposed and replaced manually  
311 with clean empty vials. SCOPE takes about five hours for complete analysis of one batch of six samples  
312 (i.e., 4 PM extracts, one negative and one positive control). For the next batch of analysis, cells, DCFH-



313 [DA and samples are manually replaced with freshly prepared vials. In our experiments for this](#)  
314 [manuscript, one batch was run per day, although it is possible to run up to three batches \(a total of](#)  
315 [twelve PM samples\) per day.](#)

## 316 **3 Results and Discussions**

### 317 **3.1 Instrument Calibration**

318 The results of OP of the samples (i.e., field blank filter, positive control or PM extract) are reported as  
319 the percentage increase in fluorescence relative to the negative control ~~(i.e., cells treated with DI)~~,  
320 which is consistent with many previous studies (Sun et al., 2011; Thayyullathil et al., 2008; Wan et al.,  
321 2012; Wang et al., 2012). Normalizing by the negative control which is analyzed in the same batch of the  
322 samples is important, because absolute fluorescence of the cells treated with negative control is not  
323 stable and vary in each experiment. Two factors could cause this variability in apparent response of the  
324 cells. First, DCFH-DA, being a photo-chemically active compound (Castro-Alf3rez et al., 2016; Chen et al.,  
325 2010), could itself undergo possible decay and slight photo-degradation over time. Second, the exposed  
326 cells could be under different developmental stages, which affects their metabolic activity and the  
327 subsequent generation of ROS. Both of these factors yield substantial variability [Coefficient of variation  
328 (CoV) = 35%, as obtained from the experiments conducted on 20 different days] in absolute  
329 fluorescence of the cells treated with DI (see Fig. [S41](#) in the [supplementary informationSI](#)). However,  
330 normalizing the fluorescence of a sample with that of the negative control minimizes this variability. For  
331 example, CoV for the ratio of the fluorescence caused by the positive controls (zymosan, concentration  
332 = 100  $\mu\text{g}/\text{mL}$ ) versus respective negative controls was only 16 % (Fig. [S41](#)). Therefore, fluorescence of all  
333 the samples (i.e., filter blank, field blank, positive control or PM extract) was normalized with that of the  
334 negative control, analyzed in the same batch of the samples. This normalized fluorescence of the sample  
335 was then blank corrected by subtracting corresponding fluorescence of the blank, which was DI for the  
336 positive control and field blank filter extract for the PM extract.

337

338 Fig. 3 shows the response curve for various concentrations of t-BOOH (3.51 – 87.83 mg/mL), which was  
339 used to calibrate the instrument. The calibration equation shown in Fig. 3 was used to convert the blank-  
340 corrected OP (% increase in fluorescence) to the equivalent units of mg/mL t-BOOH (see Sect. [S1](#) ~~in the~~  
341 [the supplementary informationSI](#) for calculations). At concentrations higher than 87.83 mg/mL t-BOOH,  
342 the curve becomes non-linear (see Fig. [S5 S2](#) in the [SI supplemental information](#)), but here we show only  
343 linear portion of the curve for the convenience of calculating the calibration equation.

### 344 **3.2 Limit of Detection (LOD)**

345 The LOD of SCOPE is defined as three times the standard deviation of multiple blanks. For this study, the  
346 LOD was calculated from the field blank filters (FB, N=10) analyzed in different batches. As discussed  
347 earlier, the OP response from these blanks was expressed as percentage increase in fluorescence with  
348 respect to corresponding negative control (analyzed in the same batch as FB). The LOD obtained from  
349 the average and standard deviation of this data is converted to equivalent units of t-BOOH (mg/mL)  
350 using the calibration equation shown in [Fig. 3](#) ~~Fig. 4~~. The LOD obtained by this method is 1.26 mg/mL t-  
351 BOOH. Note, an ideal expression of LOD should have been in terms of the threshold PM mass required

352 to yield a signal significantly distinguishable from the blanks, however, expressing LOD in those units is  
353 complicated given the variability associated with PM, such as different chemical composition of the PM  
354 samples collected on different days and the variability in extraction procedures (e.g., volume of water  
355 used for PM extraction and the filter area which can be submerged in that volume). Nevertheless, based  
356 on several experiments conducted in our lab, we found it is difficult to detect a signal for a PM extract  
357 with concentration below 20 µg/mL, which could be considered as a rough measure of the detection  
358 limit for SCOPE.

### 359 **3.3 Precision and Accuracy**

360 For determining analytical precision of SCOPE, three different types of samples, i.e., positive controls  
361 (9.75 mM t-BOOH and 100 µg/mL Zymosan), Cu (II) solution (20 µM), and water-soluble PM extracts  
362 were used. For PM extracts, ten different circular sections (each 1 inch 4" in diameter) were punched  
363 from ten different spots on one of the high-volume filters collected in the Midwest Sampling Campaign  
364 (Sect. 2.75) and extracted in DI (Sect. 2.86). The blank corrected % normalized OP response of the PM  
365 extract was further normalized by the PM mass concentration of PM extract (30 µg/mL) -used in the RV  
366 for exposure to the cells. Table 1 shows the average, standard deviation and CoV obtained from the  
367 measurements of various samples.

368

369 The instrument showed a CoV less than 20% for most cases suggesting high reproducibility of the  
370 results. Among the positive controls, CoV for zymosan was the highest (39%), as compared to 14 %, 14 %  
371 and 16 % obtained for Cu (II), PM samples and t-BOOH, respectively. We suspect that higher CoV for  
372 zymosan is partly due to water-insoluble nature of zymosan (Gao et al., 2012; Venkatachalam et al.,  
373 2020), which is often used as a suspended particle in phagocytosis assays (Sung et al., 1983; Thomas et  
374 al., 2007; Underhill, 2003). This could lead to deposition of zymosan particles inside tubing of the  
375 instrument, leading to an underestimation in the OP measurement. In contrast, t-BOOH is highly water-  
376 soluble [700,000 mg/L (OECD/SIDS, 1995)] and thus involves no such complications. ~~t-BOOH has~~  
377 ~~previously been shown to induce oxidative stress not only in macrophages (Lopes et al., 2017; Prasad et~~  
378 ~~al., 2007; Roux et al., 2019) but also in a variety of other cells such as hepatocytes (Kučera et al., 2014),~~  
379 ~~sperm cells (Fatemi et al., 2012), and lung fibroblast cells (Lopes et al., 2017).~~ t-BOOH is a well-  
380 established inducer of oxidative stress, not only in macrophages (Lopes et al., 2017; Prasad et al., 2007;  
381 Roux et al., 2019) but also in a variety of other cells such as hepatocytes (Kučera et al., 2014), sperm  
382 cells (Fatemi et al., 2012), and lung fibroblast cells (Lopes et al., 2017). t-BOOH diffuses through the cell  
383 membrane quite efficiently and has been demonstrated to induce a comprehensive oxidative stress  
384 response through the generation of a variety of species including H<sub>2</sub>O<sub>2</sub>, alkoxyl and peroxy radicals. t-  
385 BOOH has also been found to be more stable in the cellular systems (Abe and Saito 1998), and also a  
386 better at glutathione (GSH) depletion (Dierickx et al., 1999), inhibiting peroxiredoxin activity (Ikeda et al.,  
387 2011), evoke a more consistent cellular antioxidant response (Alia et al., 2005), cause a greater DNA  
388 damage (Slamenova et al., 2013) and promote a more efficient peroxidation of membrane lipids as  
389 compared to other oxidants such as H<sub>2</sub>O<sub>2</sub> (Guidarelli et al., 1997). ~~These results~~ Our results along with  
390 these studies suggest that t-BOOH could be a more reliable positive control than zymosan for the  
391 macrophage ROS assay, particularly for the automated operation of our instrument.

392

### 393 3.4 Accuracy

394 The accuracy of SCOPE was evaluated by comparing the instrument's response with that obtained from  
395 the manual operation using both positive controls and ambient PM samples. We prepared different  
396 concentrations of t-BOOH from 0.04 to 9.75 mM (0.04, 0.39, 0.97, 1.95 and 9.75 mM, in the RVs used for  
397 exposure to the macrophages) 3.51 to 878.29 mg/mL (3.51, 35.13, 87.83, 175.66 and 878.29 mg/mL, in  
398 the RVs used for exposure to the macrophages), and analyses were conducted both manually and using  
399 the instrument. Fig. 4 shows the comparison of manual and automated measurements of ROS induced  
400 by various concentrations of t-BOOH. The slope of the automated versus manual measurements for the  
401 positive control was ~0.83 with a very high coefficient of determination ( $r^2 = 0.99$ ). The automated  
402 measurements were slightly but consistently lower than the manual measurements. This bias could  
403 probably be caused by the error introduced during transfer of cells using the fluid-transfer unit (i.e.,  
404 some loss of cells in valves or tubing), leading to slight inconsistency of the cell density in RVs. Though,  
405 this deposition of the cells is not expected to yield cross contamination of the samples, given a rigorous  
406 cleaning procedure (as discussed in Sect. 2.67) employed during operation of the instrument.

407

408 One of the major objectives of developing SCOPE was to enable a high through-put analysis of the PM  
409 samples. To demonstrate this ability of the instrument, fifty ambient PM<sub>2.5</sub> samples collected from  
410 various sites in the Midwest US (Sect. 2.75) were analyzed and the results from the automated  
411 instrument were compared with manual measurements. The results are expressed in terms of the  
412 equivalent units of t-BOOH (mg of t-BOOH per mg of PM), and the comparison is shown in Fig. 5 (see  
413 Sect. S1 of the SI supplementary information for the calculation procedure). Overall, there was very  
414 good comparison between the manual and automated measurements, with a slope of 0.83 and a  
415 coefficient of determination ( $r^2 = 0.71$ ).

### 416 3.5.4 Intrinsic OP of individual PM chemical species

417 To demonstrate the utility of SCOPE, we tested several compounds commonly known to be present in  
418 the ambient PM. These include 11 metallic species [Fe (II), Fe (III), Cu(II), Mn(II), Zn (II), Al (III), Pb (II), Cr  
419 (III), Cd (II), V (III) and Ni (II)], 4 quinones (PQN, 1,4-NQN, 1,2-NQN and 5-H-1,4-NQN), 7 PAHs  
420 (Phenanthrene, Anthracene, Naphthalene, Pyrene, Fluorene, B[a]P and B[a]A) and 6 inorganic salts (KCl,  
421 NaCl, NH<sub>4</sub>Cl, NH<sub>4</sub>NO<sub>3</sub>, NH<sub>4</sub>SO<sub>4</sub> and CaCl<sub>2</sub>). The concentrations used for these compounds, i.e., 0.5 μM for  
422 metals, 0.2 μM for quinones and PAHs, 5 μM for KCl, NH<sub>4</sub>Cl, NH<sub>4</sub>NO<sub>3</sub>, NH<sub>4</sub>SO<sub>4</sub>, CaCl<sub>2</sub> and 1 μM for NaCl,  
423 were in their typical ranges present in the ambient PM<sub>2.5</sub> and similar to those used in previous studies  
424 based on acellular assays (Charrier and Anastasio, 2012; Yu et al., 2018). We are not aware of any study  
425 which has systematically explored and compared the DCFH-based OP of individual PAHs vs. various  
426 metals or quinones in alveolar macrophages (murine cell line NR8383).

427

428 Fig. 6 shows the OP of these chemical species. To assess significant differences in the OP responses, we  
429 used a one-way ANOVA (analysis of variance) test followed by Tukey's test for post-hoc analysis on the  
430 intrinsic OP responses of different groups of the species, i.e., metals, organic and inorganic compounds.  
431 Among metals, Fe (II), Mn (II), and Cu (II) induced the highest response (12.40 -9.95 mg/mL t-BOOH).  
432 Although, the OP of these three metals were not statistically different from each other, their responses

433 were significantly different from the rest of the metals ( $p < 0.05$ ). Other metals [Fe (III), Zn (II), Pb (II), Al  
434 (III), Cr (III), Cd (II) and V(III)] induced very low response ( $< 4.5$  mg/mL t-BOOH), and there was no  
435 statistical difference among their responses ( $p > 0.05$ ). Among metals, Fe (II), Mn (II), and Cu (II) induced  
436 the highest response (12.40–9.95 mg/mL t-BOOH). In contrast, metals such as Zn (II), Pb (II), Al (III), Cr  
437 (III), Cd (II), V(III) induced low response ( $< 4.5$  mg/mL t-BOOH). Ni (II) caused almost negligible oxidative  
438 stress (about 20 times lower than that of Fe (II)) and the response was lower than LOD of the  
439 instrument. Interestingly, Fe (III) induced comparatively much lower response ( $\sim 3$  times lower) than Fe  
440 (II), which matches with their relative redox activities as measured by the dithiothreitol (DTT) assay, i.e.,  
441 3 times lower intrinsic DTT activity of Fe (III) compared to Fe (II) (Charrier and Anastasio, 2012).  
442 Interestingly, the pattern of Fe (III) vs. Fe (II) OP response ( $\sim 3$  times lower response of Fe III than Fe II)  
443 matches with their relative redox activities as measured by the dithiothreitol (DTT) assay, i.e., 3 times  
444 lower intrinsic DTT activity of Fe (III) compared to Fe (II) (Charrier and Anastasio, 2012).

445  
446 Among the organic compounds, PQN and 1,2-NQN showed the highest response (7.51 and 6.52 mg/mL  
447 t-BOOH, respectively), however, their responses were significantly lower ( $p > 0.05$ ) than that of the  
448 metals Fe (II), Mn (II) and Cu (II). Other than these two quinones, the OP of any of the organic  
449 compounds, i.e., PAHs, 1, 4-NQN and 5-H-1,4-NQN was not significantly above the negative control.

450 Among the organic compounds, quinones dominated the ROS response<sup>OP</sup>. PQN, 1,2-NQN, 1,4-NQN  
451 showed the highest response (7.51–4.92 mg/mL t-BOOH) and followed Fe (II), Mn (II) and Cu (II) in the  
452 decreasing order of response. In contrast, 5-H-1,4-NQN showed a very low response of 2.87 mg/mL t-  
453 BOOH. PQN and 1,2-NQN and 1,4-NQN are among the most abundantly found quinones in ambient air  
454 (Charrier and Anastasio, 2012), known to show a high redox cycling capability transitioning to and from  
455 their semiquinone forms, as well as the ability to cause DNA damage and induce apoptosis in cells (Klotz  
456 et al., 2014; Shang et al., 2014; Shinkai et al., 2012; Yang et al., 2018). Therefore, a high intrinsic OP of  
457 these quinones indicates towards their prominent role in other cellular responses such as inflammation  
458 and cell death.

459 PAHs showed very low response ( $< 4$  mg/mL t-BOOH), and the differences among their responses were  
460 not significant at the concentration tested in our experiments (i.e.,  $0.2 \mu\text{M}$ ). Phenanthrene and B[a]P,  
461 showed the lowest responses ( $< 2$  mg/mL t-BOOH), and it seems highly unlikely for these PAHs to make  
462 any appreciable contribution to the oxidative stress of ambient  $\text{PM}_{2.5}$ , as measured by the macrophage  
463 ROS assay. The insignificant contribution of PAHs in the cellular OP measured in our study This is in  
464 contrast to several studies conducted on bronchial epithelial BEAS-2B cells (Landkocz et al., 2017), acute  
465 monocytic leukemia THP-1 cells (Den Hartigh et al., 2010) and U937 cell line (Tsai et al., 2012), which  
466 have suggested that PAHs such as B[a]A, B[a]P, pyrene, anthracene and phenanthrene are the important  
467 drivers of oxidative stress and cytotoxicity. However, these cells of human origin differ significantly from  
468 the murine cell lines used in our study in terms of their morphology (Krombach et al., 1997), expression  
469 of certain reactive nitrogen species and related enzymes (Jesch et al., 1997), and membrane proteins  
470 (Jaguin et al., 2013). Certain mechanisms, such as aryl hydrocarbon receptor (AhR)-mediated activity  
471 which activates the CYP450 gene, are necessary for the initial steps of bio-activation of PAHs (Rossner et  
472 al., 2020) to convert them into more redox-active products. It has also been shown that such  
473 mechanistic pathways differ substantially among different cells (Libalova et al., 2018; Vondráček et al.,  
474 2017). For example, it has been demonstrated that baseline esterase activities as well as secretion of

475 cytochrome P450, which could markedly affect cellular metabolism, result in varied responses of murine  
476 and human cell lines to organic compounds (Veronesi and Ehrich, 1993). There is also a marked  
477 difference in the distribution of peroxisomal proteins (such as catalases) in human and mouse lung cells  
478 which could be responsible for different ROS activity in both types of cells (Karnati and Baumgart-Vogt,  
479 2008). Therefore, a direct comparison between our results and those studies showing a significant role  
480 of PAHs in the oxidative stress is probably not reasonable.

481  
482 ~~Among the inorganic salts,  $\text{NH}_4\text{NO}_3$  and  $\text{NH}_4\text{SO}_4$  showed the lowest responses ( $<1.5 \text{ mg/mL t-BOOH}$ ).~~  
483 ~~Although, the average response of chloride salts such as KCl, NaCl,  $\text{NH}_4\text{Cl}$  and  $\text{CaCl}_2$  (3.22–2.34  $\text{mg/mL t-BOOH}$ )~~  
484 ~~seems to be slightly higher than other salts, there was no significant difference in the responses~~  
485 ~~( $p>0.05$ ; unpaired t-test) of any of these salts. Inorganic salts showed the lowest responses among all~~  
486 ~~tested compounds and there was no significant difference in the responses ( $p>0.05$ ; one-way ANOVA) of~~  
487 ~~any of these salts.~~ Overall, at atmospherically relevant concentrations, inorganic salts seem to have very  
488 low contribution, if at all, to the oxidative stress as compared to the metals and quinones. This is  
489 consistent with previous studies based on ambient PM samples, showing either nil or inconsistent  
490 correlation of the macrophage ROS response with the concentration of inorganic ions (Hu et al., 2008;  
491 Kam et al., 2011; Verma et al., 2009; Wang et al., 2013; Xu et al., 2020).

#### 492 **4 Conclusion**

493 In this paper, we have described the development of SCOPE for assessing the OP of water-soluble  
494 extracts of ambient PM in rat alveolar macrophages. The promising results of this instrument could pave  
495 the way for further development in automating other cellular assays. Moreover, since real-time  
496 instruments based on acellular OP assays have been developed in recent past, the current research  
497 opens up the road for the development of such online instruments based on mammalian cell lines,  
498 possibly coupling it to a real-time ambient PM sampling device (e.g., particle-into-liquid sampler or mist  
499 chamber). SCOPE is capable of analyzing up to 6 samples in a span of 5 hours without any manual  
500 intervention. The results of performance evaluation of the instrument demonstrate a high precision and  
501 accuracy for both positive control and the PM samples.

502  
503 Overall, we have shown a first of its kind instrument capable of performing cellular OP measurements of  
504 PM. It substantially reduces the extent of manual labor associated with conducting cellular assays  
505 resulting in increased throughput of the results. We demonstrated that SCOPE is capable of handling  
506 large number of ambient PM samples, thus, providing an opportunity for generating an extensive  
507 dataset on cellular OP, that can be used in epidemiological studies. We also generated a database of  
508 several chemical compounds commonly known to be present in the ambient PM. Metals such as Fe (II),  
509 Mn (II) and Cu (II) dominated the OP, which were followed by quinones such as PQN ~~and~~ 1,2-NQN ~~and~~  
510 1,4-NQN. PAHs and inorganic salts ~~showed~~ showed insignificant OP OP as compared to the most metals  
511 and quinones. Further investigations on the interactions of these chemical species may be undertaken in  
512 future studies. Note, the ROS probe used in our study (DCFH-DA) does not measure the concentration of  
513 specific ROS (e.g.,  $\text{H}_2\text{O}_2$ ,  $\text{OH}\cdot$ ,  $\text{ROO}\cdot$ ,  $\cdot\text{O}_2^-$ , etc) separately, and therefore it is possible that despite a  
514 similar OP of the  $\text{PM}_{2.5}$  chemical species as measured by SCOPE, the concentrations of the specific ROS,

515 and the resulting health impacts caused by these ROS might be very different. Moreover, the reactivity  
516 of DCFH-DA to interact directly with the PM chemical components is not explored. Future studies should  
517 include specific measurement of different ROS using specific probes along with total OP to better  
518 understand the relationship between different chemical species and their health impacts.

519

520 *Data availability.* Supplementary data is provided with the manuscript.

521

522 *Author contributions.* SS developed the instrument, performed the experiments and prepared the  
523 manuscript. YW contributed in filters collection, helped in developing the manual protocol for cell-based  
524 experiments and edited the manuscript. JVP helped in developing the instrument and edited the  
525 manuscript. VV conceived the idea, organized the manuscript and supervised the overall project.

526

527 *Competing interests.* The authors declare that they have no conflict of interest.

528

529 *Acknowledgments.* This work was supported by the National Science Foundation under Grant No. CBET-  
530 1847237. We thank Sandra McMasters, the director of cell media facility at UIUC for providing us  
531 NR8383 Cell Culture and media.

532

533

534

535

536

537 **References**

538 **References**

539 Abe, K., and Saito, H: Characterization of t-butyl hydroperoxide toxicity in cultured rat cortical neurones  
540 and astrocytes, *Pharmacology and Toxicology*, 83(1), 40–46, [https://doi.org/10.1111/j.1600-](https://doi.org/10.1111/j.1600-0773.1998.tb01440.x)  
541 [0773.1998.tb01440.x](https://doi.org/10.1111/j.1600-0773.1998.tb01440.x), 1998.

542 Alfano, R., Herceg, Z., Nawrot, T. S., Chadeau-Hyam, M., Ghantous, A., and Plusquin, M.: The Impact of  
543 Air Pollution on Our Epigenome: How Far Is the Evidence? (A Systematic Review), *Curr. Environ. Health*  
544 *Rep.*, 5(4), 544–578, <https://doi.org/10.1007/s40572-018-0218-8>, 2018.

545 Alía, M., Ramos, S., Mateos, R., Bravo, L. and Goya, L.: Response of the antioxidant defense system to  
546 tert-butyl hydroperoxide and hydrogen peroxide in a human hepatoma cell line (HepG2), *J. Biochem.*  
547 *Mol. Toxicol.*, 19(2), 119–128, <https://doi.org/10.1002/jbt.20061>, 2005.

548 Berg, K. E., Clark, K. M., Li, X., Carter, E. M., Volckens, J., and Henry, C. S.: High-throughput, semi-  
549 automated dithiothreitol (DTT) assays for oxidative potential of fine particulate matter, *Atmos. Environ.*,  
550 222, 117132, <https://doi.org/10.1016/j.atmosenv.2019.117132>, 2020.

551 Brehmer, C., Lai, A., Clark, S., Shan, M., Ni, K., Ezzati, M., Yang, X., Baumgartner, J., Schauer, J. J., and  
552 Carter, E.: The Oxidative Potential of Personal and Household PM<sub>2.5</sub> in a Rural Setting in Southwestern  
553 China. *Environ. Sci. and Technol.*, 53(5), 2788–2798, <https://doi.org/10.1021/acs.est.8b05120>, 2019.

554 Breitner, S., Peters, A., Zareba, W., Hampel, R., Oakes, D., Wiltshire, J., Frampton, M. W., Hopke, P. K.,  
555 Cyrus, J., Utell, M. J., Kane, C., Schneider, A., and Rich, D. Q.: Ambient and controlled exposures to  
556 particulate air pollution and acute changes in heart rate variability and repolarization, *Sci. Rep.*, 9(1), 1–  
557 12, <https://doi.org/10.1038/s41598-019-38531-9>, 2019.

558 Brömme, H. J., Zühlke, L., Silber, R. E., and Simm, A.: DCFH2 interactions with hydroxyl radicals and other  
559 oxidants - Influence of organic solvents, *Exp. Gerontol.*, 43(7), 638–644,  
560 <https://doi.org/10.1016/j.exger.2008.01.010>, 2008.

561 Brown, A. R., Stevanovic, S., Bottle, S., and Ristovski, D. Z.: An instrument for the rapid quantification of  
562 PM-bound ROS: The Particle into Nitroxide Quencher (PINQ), *Atmos. Meas. Tech.*, 12(4), 2387–2401,  
563 <https://doi.org/10.5194/amt-12-2387-2019>, 2019.

564 Castro-Alfárez, M., Polo-López, M. I., and Fernández-Ibáñez, P.: Intracellular mechanisms of solar water  
565 disinfection, *Sci. Rep.*, 6(1), 1–10, <https://doi.org/10.1038/srep38145>, 2016.

566 Charrier, J. G., and Anastasio, C. (2012): On dithiothreitol (DTT) as a measure of oxidative potential for  
567 ambient particles: Evidence for the importance of soluble \newline transition metals, *Atmos. Chem.*  
568 *Phys.*, 12(19), 9321–9333, <https://doi.org/10.5194/acp-12-9321-2012>, 2012.

569 Chen, F., Vallyathan, V., Castranova, V., and Shi, X.: Cell apoptosis induced by carcinogenic metals, *Mol.*  
570 *Cell. Biochem.*, 222(1–2), 183–188, <https://doi.org/10.1023/A:1017970330982>, 2001.

571 Chen, X., Zhong, Z., Xu, Z., Chen, L., and Wang, Y.: 2',7'-Dichlorodihydrofluorescein as a fluorescent  
572 probe for reactive oxygen species measurement: Forty years of application and controversy, *Free Radic.*  
573 *Res.*, 44(6), 587–604, <https://doi.org/10.3109/10715761003709802>, 2010.

574 Cheung, K., Shafer, M. M., Schauer, J. J., and Sioutas, C.: Diurnal trends in oxidative potential of coarse  
575 particulate matter in the Los Angeles basin and their relation to sources and chemical composition,  
576 *Environ. Sci. Technol.*, 46(7), 3779–3787, <https://doi.org/10.1021/es204211v>, 2012.

577 Crobeddu, B., Aragao-Santiago, L., Bui, L. C., Boland, S., and Baeza Squiban, A.: Oxidative potential of  
578 particulate matter 2.5 as predictive indicator of cellular stress, *Environ. Pollut.*, 230, 125–133,  
579 <https://doi.org/10.1016/j.envpol.2017.06.051>, 2017.

580 Delfino, R. J., Staimer, N., Tjoa, T., Gillen, D. L., Schauer, J. J., and Shafer, M. M.: Airway inflammation  
581 and oxidative potential of air pollutant particles in a pediatric asthma panel, *J. Expo. Sc. Environ.*  
582 *Epidemiol.*, 23(5), 466–473, <https://doi.org/10.1038/jes.2013.25>, 2013.

583 Den Hartigh, L. J., Lamé, M. W., Ham, W., Kleeman, M. J., Tablin, F., and Wilson, D. W.: Endotoxin and  
584 polycyclic aromatic hydrocarbons in ambient fine particulate matter from Fresno, California initiate

585 human monocyte inflammatory responses mediated by reactive oxygen species, *Toxicol.in Vitro*, 24(7),  
586 1993–2002, <https://doi.org/10.1016/j.tiv.2010.08.017>, 2010.

587 [Dierickx, P. J., Van Nuffel, G., and Alvarez, I.: Glutathione protection against hydrogen peroxide, tert-](#)  
588 [butyl hydroperoxide and diamide cytotoxicity in rat hepatoma-derived Fa32 cells, \*Hum. Exp. Toxicol.\*,](#)  
589 [18\(10\), 627–633, <https://doi.org/10.1191/096032799678839482>,1999.](#)

590 Dikalov, S. I., and Harrison, D. G.: Methods for detection of mitochondrial and cellular reactive oxygen  
591 species, *Antioxid. Redox Signal.*, 20(2), 372–382, <https://doi.org/10.1089/ars.2012.4886>, 2014.

592 [Dikalov, S. I., Polienko, Y. F., & Kirilyuk, I.: Electron Paramagnetic Resonance Measurements of Reactive](#)  
593 [Oxygen Species by Cyclic Hydroxylamine Spin Probes, \*Antioxid. Redox Signal.\*, 28\(15\), 1433–1443,](#)  
594 [https://doi.org/10.1089/ars.2017.7396, 2018.](#)

595 Doble, M., Venkatachalam, G., and Arumugam, S.: Synthesis, characterization, and biological activity of  
596 aminated zymosan, *ACS Omega*, 5(26), 15973–15982, <https://doi.org/10.1021/acsomega.0c01243>,  
597 2020.

598 Doiron, D., de Hoogh, K., Probst-Hensch, N., Mbatchou, S., Eeftens, M., Cai, Y., Schindler, C., Fortier, I.,  
599 Hodgson, S., Gaye, A., Stolk, R., and Hansell, A.: Residential air pollution and associations with wheeze  
600 and shortness of breath in adults: A combined analysis of cross-sectional data from two large European  
601 cohorts, *Environ. Health Perspect.*, 125(9), 1–10. <https://doi.org/10.1289/EHP1353>, 2017.

602 Fang, T., Verma, V., Guo, H., King, L. E., Edgerton, E. S., and Weber, R. J.: A semi-automated system for  
603 quantifying the oxidative potential of ambient particles in aqueous extracts using the dithiothreitol (DTT)  
604 assay: Results from the Southeastern Center for Air Pollution and Epidemiology (SCAPE), *Atmos. Meas.*  
605 *Tech.*, 8(1), 471–482, <https://doi.org/10.5194/amt-8-471-2015>, 2015.

606 Fatemi, N., Sanati, M. H., Jamali Zavarehei, M., Ayat, H., Esmaeili, V., Golkar-Narenji, A., Zarabi, M., and  
607 Gourabi, H.: Effect of tertiary-butyl hydroperoxide (TBHP)-induced oxidative stress on mice sperm  
608 quality and testis histopathology, *Andrologia*, 45(4), 232–239. <https://doi.org/10.1111/j.1439->  
609 [0272.2012.01335.x](#), 2013.

610 Gao, D., Fang, T., Verma, V., Zeng, L., and Weber, R. J.: A method for measuring total aerosol oxidative  
611 potential (OP) with the dithiothreitol (DTT) assay and comparisons between an urban and roadside site  
612 of water-soluble and total OP, *Atmos. Meas. Tech.*, 10(8), 2821–2835, <https://doi.org/10.5194/amt-10->  
613 [2821-2017](#), 2017.

614 Gao, Y., Jiang, R., Qie, J., Chen, Y., Xu, D., Liu, W., and Gao, Q.: Studies on the characteristic and activity  
615 of low-molecular fragments from zymosan, *Carbohydr. Polym.*, 90(4), 1411–1414,  
616 <https://doi.org/10.1016/j.carbpol.2012.05.096>, 2012.

617 [Guidarelli, A., Cattabeni, F., and Cantoni, O.: Alternative mechanisms for hydroperoxide-induced DNA](#)  
618 [single strand breakage, \*Free Radic. Res.\*, 26\(6\), 537-547, <https://doi.org/10.3109/10715769709097825>,](#)  
619 [1997.](#)

620 Helmke, R. J., Boyd, R. L., German, V. F., and Mangos, J. A.: From growth factor dependence to growth  
621 factor responsiveness: The genesis of an alveolar macrophage cell line, *In Vitro Cellular Dev. Biol.*, 23(8),  
622 567–574, <https://doi.org/10.1007/BF02620974>, 1987.



623 Holm, S. M., Balmes, J., Gillette, D., Hartin, K., Seto, E., Lindeman, D., Polanco, D., and Fong, E.: Cooking  
624 behaviors are related to household particulate matter exposure in children with asthma in the urban  
625 East Bay Area of Northern California, PLoS ONE, 13(6), 1–15,  
626 <https://doi.org/10.1371/journal.pone.0197199>, 2018.

627 Hu, S., Polidori, A., Arhami, M., Shafer, M. M., Schauer, J. J., Cho, A., and Sioutas, C.: Redox activity and  
628 chemical speciation of size fractioned PM in the communities of the Los Angeles-Long Beach harbor,  
629 Atmos. Chem. Phys., 8(21), 6439–6451, <https://doi.org/10.5194/acp-8-6439-2008>, 2008.

630 Huang, W., Zhang, Y., Zhang, Y., Zeng, L., Dong, H., Huo, P., Fang D. and Schauer, J. J.: Development of an  
631 automated sampling-analysis system for simultaneous measurement of reactive oxygen species (ROS) in  
632 gas and particle phases: GAC-ROS, Atmos. Environ., 134, 18-26,  
633 <https://doi.org/10.1016/j.atmosenv.2016.03.038>, 2016.

634 [Ikeda, Y., Nakano, M., Ihara, H., Ito, R., Taniguchi, N., and Fujii, J.: Different consequences of reactions](#)  
635 [with hydrogen peroxide and t-butyl hydroperoxide in the hyperoxidative inactivation of rat](#)  
636 [peroxiredoxin-4, J. Biochem., 149\(4\), 443–453, <https://doi.org/10.1093/jb/mvq156>, 2011.](#)

637 Jaguin, M., Houlbert, N., Fardel, O., and Lecureur, V.: Polarization profiles of human M-CSF-generated  
638 macrophages and comparison of M1-markers in classically activated macrophages from GM-CSF and M-  
639 CSF origin, Cell. Immunol., 281(1), 51–61, <https://doi.org/10.1016/j.cellimm.2013.01.010>, 2013.

640 Janssen, N. A. H., Strak, M., Yang, A., Hellack, B., Kelly, F. J., Kuhlbusch, T. A. J., Harrison, R. M.,  
641 Brunekreef, B., Cassee, F. R., Steenhof, M., and Hoek, G.: Associations between three specific a-cellular  
642 measures of the oxidative potential of particulate matter and markers of acute airway and nasal  
643 inflammation in healthy volunteers, Occup. Environ. Med., 72(1), 49–56,  
644 <https://doi.org/10.1136/oemed-2014-102303>, 2015.

645 [Jeong, M. S., Yu, K. N., Chung, H. H., Park, S. J., Lee, A. Y., Song, M. R., Cho, M. H., and Kim, J. S.:](#)  
646 [Methodological considerations of electron spin resonance spin trapping techniques for measuring](#)  
647 [reactive oxygen species generated from metal oxide nanomaterials, Sci. Rep., 6\(February\), 1–10,](#)  
648 [<https://doi.org/10.1038/srep26347>, 2016.](#)

649 Jesch, N. K., Dörger, M., Enders, G., Rieder, G., Vogelmeier, C., Messmer, K., and Krombach, F.:  
650 Expression of inducible nitric oxide synthase and formation of nitric oxide by alveolar macrophages: an  
651 interspecies comparison, Environ. Health Perspect., 105(suppl 5), 1297-1300,  
652 <https://doi.org/10.1289/ehp.97105s51297>, 1997.

653 Kalyanaraman, B., Darley-Usmar, V., Davies, K. J., Dennery, P. A., Forman, H. J., Grisham, M. B., Mann,  
654 G.E., Moore, K., Roberts II, L.J., and Ischiropoulos, H.: Measuring reactive oxygen and nitrogen species  
655 with fluorescent probes: challenges and limitations, Free Radic. Biol. Med., 52(1), 1-6,  
656 <https://doi.org/10.1016/j.freeradbiomed.2011.09.030>, 2012.

657 Kam, W., Ning, Z., Shafer, M. M., Schauer, J. J. and Sioutas, C.: Chemical characterization and redox  
658 potential of coarse and fine particulate matter (PM) in underground and ground-level rail systems of the  
659 Los Angeles Metro, Environ. Sci. and Technol., 45(16), 6769-6776, <https://doi.org/10.1021/es201195e>,  
660 2011.

661 Karakatsani, A., Analitis, A., Perifanou, D., Ayres, J. G., Harrison, R. M., Kotronarou, A., Kavouras, I. G.,  
662 Pekkanen, J., Hämeri, K., Kos, G. P., De Hartog, J. J., Hoek, G., and Katsouyanni, K.: Particulate matter air  
663 pollution and respiratory symptoms in individuals having either asthma or chronic obstructive  
664 pulmonary disease: A European multicentre panel study, *Environ. Health* 11(1), 1–16,  
665 <https://doi.org/10.1186/1476-069X-11-75>, 2012.

666 Klein, C. B., Su, L., Bowser, D., and Leszczynska, J.: Chromate-induced epimutations in mammalian cells,  
667 *Environ. Health Perspect.*, 110(Suppl. 5), 739–743, <https://doi.org/10.1289/ehp.02110s5739>, 2002.

668 Klotz, L. O., Hou, X., and Jacob, C.: 1,4-naphthoquinones: From oxidative damage to cellular and inter-  
669 cellular signaling, *Molecules*, 19(9), 14902–14918, <https://doi.org/10.3390/molecules190914902>, 2014.

670 Krombach, F., Münzing, S., Allmeling, A. M., Gerlach, J. T., Behr, J., and Dörger, M.: Cell size of alveolar  
671 macrophages: an interspecies comparison, *Environ. Health Perspect.*, 105 Suppl 5(September), 1261–  
672 1263, <https://doi.org/10.1289/ehp.97105s51261>, 1997.

673 Kryston, T. B., Georgiev, A. B., Pissis, P., and Georgakilas, A. G.: Role of oxidative stress and DNA damage  
674 in human carcinogenesis, *Mutat. Res.*, 711(1–2), 193–201,  
675 <https://doi.org/10.1016/j.mrfmmm.2010.12.016>, 2011.

676 Kučera, O., Endlicher, R., Roušar, T., Lotková, H., Garnol, T., Drahot, Z., and Červinková, Z.: The effect of  
677 tert -butyl hydroperoxide-induced oxidative stress on lean and steatotic rat hepatocytes in vitro, *Oxid.*  
678 *Med. Cell. Longev.*, 2014, <https://doi.org/10.1155/2014/752506>, 2014.

679 Künzli, N., Mudway, I. S., Götschi, T., Shi, T., Kelly, F. J., Cook, S., Burney, P., Forsberg, B., Gauderman, J.  
680 W., Hazenkamp, M. E., Heinrich, J., Jarvis, D., Norbäck, D., Payo-Losa, F., Poli, A., Sunyer, J., and Borm, P.  
681 J. A.: Comparison of oxidative properties, light absorbance, and total and elemental mass concentration  
682 of ambient PM<sub>2.5</sub> collected at 20 European sites, *Environ. Health Perspect.*, 114(5), 684–690,  
683 <https://doi.org/10.1289/ehp.8584>, 2006.

684 Kuznetsov, A. V., Kehrer, I., Kozlov, A. V., Haller, M., Redl, H., Hermann, M., Grimm, M., and Troppmair,  
685 J.: Mitochondrial ROS production under cellular stress: Comparison of different detection methods,  
686 *Anal. Bioanal. Chem.*, 400(8), 2383–2390, <https://doi.org/10.1007/s00216-011-4764-2>, 2011.

687 Landkocz, Y., Ledoux, F., André, V., Cazier, F., Genevray, P., Dewaele, D., Martin, P. J., Lepers, C., Verdin,  
688 A., Courcot, L., Boushina, S., Sichel, F., Gualtieri, M., Shirali, P., Courcot, D., and Billet, S.: Fine and  
689 ultrafine atmospheric particulate matter at a multi-influenced urban site: Physicochemical  
690 characterization, mutagenicity and cytotoxicity, *Environ. Pollut.*, 221, 130–140,  
691 <https://doi.org/10.1016/j.envpol.2016.11.054>, 2017.

692 Landreman, A. P., Shafer, M. M., Hemming, J. C., Hannigan, M. P., and Schauer, J. J.: A macrophage-  
693 based method for the assessment of the reactive oxygen species (ROS) activity of atmospheric  
694 particulate matter (PM) and application to routine (daily-24 h) aerosol monitoring studies, *Aerosol Sci*  
695 *Technol.*, 42(11), 946–957, <https://doi.org/10.1080/02786820802363819>, 2008.

696 Lane, K. B., Egan, B., Vick, S., Abdolrasulnia, R., and Shepherd, V. L.: Characterization of a rat alveolar  
697 macrophage cell line that expresses a functional mannose receptor, *J. Leukoc. Biol.*, 64(3), 345-350,  
698 <https://doi.org/10.1002/jlb.64.3.345>, 1998.

699 Lee, J. H., and Hopke, P. K.: Apportioning sources of PM<sub>2.5</sub> in St. Louis, MO using speciation trends  
700 network data, *Atmos. Environ.*, 40(suppl. 2), 360-377, <https://doi.org/10.1016/j.atmosenv.2005.11.074>,  
701 2006.

702 Li, N., Xia, T. and Nel, A. E.: The role of oxidative stress in ambient particulate matter-induced lung  
703 diseases and its implications in the toxicity of engineered nanoparticles, *Free Radic. Biol. Med.*, 44(9),  
704 1689-1699, <https://dx.doi.org/10.1016/j.freeradbiomed.2008.01.028>, 2008.

705 Libalova, H., Milcova, A., Cervena, T., Vrbova, K., Rossnerova, A., Novakova, Z., Topinka, J., and Rossner,  
706 P.: Kinetics of ROS generation induced by polycyclic aromatic hydrocarbons and organic extracts from  
707 ambient air particulate matter in model human lung cell lines, *Mutat. Res.*, 827(January), 50–58,  
708 <https://doi.org/10.1016/j.mrgentox.2018.01.006>, 2018.

709 Lin, T. J., Hirji, N., Stenton, G. R., Gilchrist, M., Grill, B. J., Schreiber, A. D., and Befus, A. D.: Activation of  
710 macrophage CD8: pharmacological studies of TNF and IL-1 $\beta$  production, *J. Immunol.*, 164(4), 1783-1792,  
711 <https://doi.org/10.4049/jimmunol.164.4.1783>, 2000.

712 Lopes, V. R., Sanchez-Martinez, C., Strømme, M., and Ferraz, N.: In vitro biological responses to  
713 nanofibrillated cellulose by human dermal, lung and immune cells: Surface chemistry aspect, *Part. Fibre*  
714 *Toxicol.*, 14(1), 1–13, <https://doi.org/10.1186/s12989-016-0182-0>, 2017.

715 [Miljevic, B., Hedayat, F., Stevanovic, S., Fairfull-Smith, K. E., Bottle, S. E., and Ristovski, Z. D.: To sonicate](https://doi.org/10.1080/02786826.2014.981330)  
716 [or not to sonicate PM filters: Reactive oxygen species generation upon ultrasonic irradiation, \*Aerosol Sci.\*](https://doi.org/10.1080/02786826.2014.981330)  
717 [Tech.](https://doi.org/10.1080/02786826.2014.981330), 48(12), 1276–1284, <https://doi.org/10.1080/02786826.2014.981330>, 2014.

718 Møller, P., Jacobsen, N. R., Folkmann, J. K., Danielsen, P. H., Mikkelsen, L., Hemmingsen, J. G., Vesterdal,  
719 L. K., Forchhammer, L., Wallin, H., and Loft, S.: Role of oxidative damage in toxicity of particulate, *Free*  
720 *Radic. Res.*, 44(1), 1–46. <https://doi.org/10.3109/10715760903300691>, 2010.

721 Mudway, I. S., Duggan, S. T., Venkataraman, C., Habib, G., Kelly, F. J., and Grigg, J.: Combustion of dried  
722 animal dung as biofuel results in the generation of highly redox active fine particulates, *Part. Fibre*  
723 *Toxicol.*, 2, 1–11, <https://doi.org/10.1186/1743-8977-2-6>, 2005.

724 Myhre, O., Andersen, J. M., Aarnes, H., and Fonnum, F.: Evaluation of the probes 2',7'-dichlorofluorescin  
725 diacetate, luminol, and lucigenin as indicators of reactive species formation, *Biochem. Pharmacol.*,  
726 65(10), 1575–1582, [https://doi.org/10.1016/S0006-2952\(03\)00083-2](https://doi.org/10.1016/S0006-2952(03)00083-2), 2003.

727 OECD/SIDS (1995), Screening Information Data Set (SIDS) for High Production Volume Chemicals, OECD  
728 Initial Assessment, IRPTC/UNEP, Volume 1, Part 2, Organization for Economic Co-operation and  
729 Development

730 Øvrevik, J.: Oxidative potential versus biological effects: A review on the relevance of cell-free/abiotic  
731 assays as predictors of toxicity from airborne particulate matter, *Int. J. Mol. Sci.*, 20(19),  
732 <https://doi.org/10.3390/ijms20194772>, 2019.

733 Pieters, N., Plusquin, M., Cox, B., Kicinski, M., Vangronsveld, J., and Nawrot, T. S.: An epidemiological  
734 appraisal of the association between heart rate variability and particulate air pollution: A meta-analysis,  
735 *Heart*, 98(15), 1127–1135, <https://doi.org/10.1136/heartjnl-2011-301505>, 2012.

736 Pope, C. A., Burnett, R. T., Thurston, G. D., Thun, M. J., Calle, E. E., Krewski, D., and Godleski, J. J.:  
737 Cardiovascular Mortality and Long-Term Exposure to Particulate Air Pollution: Epidemiological Evidence  
738 of General Pathophysiological Pathways of Disease, *Circulation*, 109(1), 71–77,  
739 <https://doi.org/10.1161/01.CIR.0000108927.80044.7F>, 2004.

740 Prasad, D., Ram, M. S., Sawhney, R. C., Ilavazhagan, G., and Banerjee, P. K.: Mechanism of tert-  
741 butylhydroperoxide induced cytotoxicity in U-937 macrophages by alteration of mitochondrial function  
742 and generation of ROS, *Toxicol. In Vitro*, 21(5), 846-854, <https://doi.org/10.1016/j.tiv.2007.02.007>, 2007.

743 Puthussery, J. V., Zhang, C., and Verma, V.: Development and field testing of an online instrument for  
744 measuring the real-time oxidative potential of ambient particulate matter based on dithiothreitol assay,  
745 *Atmos. Meas. Tech.*, 11(10), 5767–5780, <https://doi.org/10.5194/amt-11-5767-2018>, 2018.

746 Rao, X., Zhong, J., Brook, R. D. and Rajagopalan, S.: Effect of particulate matter air pollution on  
747 cardiovascular oxidative stress pathways, *Antioxid. Redox Signal*, 28(9), 797-818,  
748 <https://dx.doi.org/10.1089/ars.2017.7394>, 2018.

749 Reuter, S., Gupta, S. C., Chaturvedi, M. M., and Aggarwal, B. B.: Oxidative stress, inflammation, and  
750 cancer: How are they linked?, *Free Radic. Biol. Med.*, 49(11), 1603–1616,  
751 <https://doi.org/10.1016/j.freeradbiomed.2010.09.006>, 2010.

752 Riojas-Rodríguez, H., Escamilla-Cejudo, J. A., González-Hermosillo, J. A., Téllez-Rojo, M. M., Vallejo, M.,  
753 Santos-Burgoa, C., and Rojas-Bracho, L.: Personal PM<sub>2.5</sub> and CO exposures and heart rate variability in  
754 subjects with known ischemic heart disease in Mexico City, *J. Expo. Sci. Environ. Epidemiol.*, 16(2), 131–  
755 137. <https://doi.org/10.1038/sj.jea.7500453>, 2006.

756 Rosenkranz, A. R., Schmaldienst, S., Stuhlmeier, K. M., Chen, W., Knapp, W., and Zlabinger, G. J.: A  
757 microplate assay for the detection of oxidative products using 2', 7'-dichlorofluorescein-diacetate, *J.*  
758 *Immunol. Methods*, 156(1), 39-45, [https://doi.org/10.1016/0022-1759\(92\)90008-h](https://doi.org/10.1016/0022-1759(92)90008-h), 1992.

759 Rossner, P., Libalova, H., Vrbova, K., Cervena, T., Rossnerova, A., Elzeinova, F., Milcova, A., Novakova, Z.,  
760 and Topinka, J.: Genotoxicant exposure, activation of the aryl hydrocarbon receptor, and lipid  
761 peroxidation in cultured human alveolar type II A549 cells, *Mutat. Res.*, 853(April), 503173,  
762 <https://doi.org/10.1016/j.mrgentox.2020.503173>, 2020.

763 Roux, C., Jafari, S. M., Shinde, R., Duncan, G., Cescon, D. W., Silvester, J., Chu, M. F., Hodgson, K., Berger,  
764 T., Wakeham, A., Palomero, L., Garcia-Valero, M., Pujana, M. A., Mak, T. W., McGaha, T. L., Cappello, P.,  
765 and Gorrini, C.: Reactive oxygen species modulate macrophage immunosuppressive phenotype through  
766 the up-regulation of PD-L1, *PNAS*, 116(10), 4326–4335, <https://doi.org/10.1073/pnas.1819473116>,  
767 2019.

768 Sameenoi, Y., Koehler, K., Shapiro, J., Boonsong, K., Sun, Y., Collett Jr, J., Volckens J. and Henry, C. S.:  
769 Microfluidic electrochemical sensor for on-line monitoring of aerosol oxidative activity, *J. Am. Chem.*  
770 *Soc.*, 134(25), 10562-10568, <https://doi.org/10.1021/ja3031104>, 2012.

771 Shang, Y., Zhang, L., Jiang, Y., Li, Y., and Lu, P.: Airborne quinones induce cytotoxicity and DNA damage in  
772 human lung epithelial A549 cells: The role of reactive oxygen species, *Chemosphere*, 100, 42–49,  
773 <https://doi.org/10.1016/j.chemosphere.2013.12.079>, 2014.

774 Shinkai, Y., Iwamoto, N., Miura, T., Ishii, T., Cho, A. K., and Kumagai, Y.: Redox cycling of 1,2-  
775 naphthoquinone by thioredoxin1 through Cys32 and Cys35 causes inhibition of its catalytic activity and  
776 activation of ASK1/p38 signaling, *Chem. Res. Toxicol.*, 25(6), 1222–1230,  
777 <https://doi.org/10.1021/tx300069r>, 2012.

778 Sigola, L. B., Fuentes, A. L., Millis, L. M., Vapenik, J., and Murira, A.: Effects of Toll-like receptor ligands on  
779 RAW 264.7 macrophage morphology and zymosan phagocytosis, *Tissue Cell*, 48(4), 389–396,  
780 <https://doi.org/10.1016/j.tice.2016.04.002>, 2016.

781 [Slamenova, D., Kozics, K., Hunakova, L., Melusova, M., Navarova, J., and Horvathova, E.: \(2013\).  
782 Comparison of biological processes induced in HepG2 cells by tert-butyl hydroperoxide \(t-BHP\) and  
783 hydroperoxide \(H2O2\): The influence of carvacrol, \*Mutat. Res. Genet. Toxicol. Environ. Mutagen\*, 757\(1\),  
784 15–22, <https://doi.org/10.1016/j.mrgentox.2013.03.014>, 2013.](#)

785 Steenhof, M., Gosens, I., Strak, M., Godri, K. J., Hoek, G., Cassee, F. R., Mudway, I. S., Kelly, F. J., Harrison,  
786 R. M., Lebret, E., Brunekreef, B., Janssen, N. A. H., and Pieters, R. H. H.: In vitro toxicity of particulate  
787 matter (PM) collected at different sites in the Netherlands is associated with PM composition, size  
788 fraction and oxidative potential - the RAPTES project, *Part. Fibre Toxicol.*, 8, 1–15,  
789 <https://doi.org/10.1186/1743-8977-8-26>, 2011.

790 Sun, J., Wang, S., Zhao, D., Hun, F. H., Weng, L., and Liu, H.: Cytotoxicity, permeability, and inflammation  
791 of metal oxide nanoparticles in human cardiac microvascular endothelial cells: Cytotoxicity,  
792 permeability, and inflammation of metal oxide nanoparticles, *Cell Biol. Toxicol.*, 27(5), 333–342,  
793 <https://doi.org/10.1007/s10565-011-9191-9>, 2011.

794 Sung, S. S. J., Nelson, R. S., and Silverstein, S. C.: Yeast mannans inhibit binding and phagocytosis of  
795 zymosan by mouse peritoneal macrophages, *J. Cell Biol.*, 96(1), 160–166,  
796 <https://doi.org/10.1083/jcb.96.1.160>, 1983.

797 Thayyullathil, F., Chathoth, S., Hago, A., Patel, M., and Galadari, S.: Rapid reactive oxygen species (ROS)  
798 generation induced by curcumin leads to caspase-dependent and -independent apoptosis in L929 cells,  
799 *Free Radic. Biol. Med.*, 45(10), 1403–1412, <https://doi.org/10.1016/j.freeradbiomed.2008.08.014>, 2008.

800 Thomas, M. G., Marwood, R. M., Parsons, A. E., and Parsons, R. B.: The effect of foetal bovine serum  
801 supplementation upon the lactate dehydrogenase cytotoxicity assay: Important considerations for in  
802 vitro toxicity analysis, *Toxicol. In Vitro*, 30(1), 300-308, <https://doi.org/10.1016/j.tiv.2015.10.007>, 2015.

803 Tsai, J. H., Chen, S. J., Huang, K. L., Lin, T. C., Chaung, H. C., Chiu, C. H., Chiu, J. Y., Lin, C. C., and Tsai, P. Y.:  
804 PM, carbon, PAH, and particle-extract-induced cytotoxicity Emissions from a diesel generator fueled  
805 with waste-edible-oil-biodiesel, *Aerosol Air Qual. Res.*, 12(5), 843–855,  
806 <https://doi.org/10.4209/aaqr.2012.07.0181>, 2012.

807 Underhill, D. M.: Macrophage recognition of zymosan particles, *J. Endotoxin Res.*, 9(3), 176–180,  
808 <https://doi.org/10.1179/096805103125001586>, 2003.

809 Venkatachalam, G., Arumugam, S., and Doble, M.: Synthesis, Characterization, and Biological Activity of  
810 Aminated Zymosan, *ACS omega*, 5(26), 15973-15982, <https://doi.org/10.1021/acsomega.0c01243>, 2020.

811 Venkatachari, P., and Hopke, P. K.: Development and laboratory testing of an automated monitor for the  
812 measurement of atmospheric particle-bound reactive oxygen species (ROS), *Aerosol Sci. Technol.*, 42(8),  
813 629–635, <https://doi.org/10.1080/02786820802227345>, 2008.

814 Verma, V., Ning, Z., Cho, A. K., Schauer, J. J., Shafer, M. M., and Sioutas, C.: Redox activity of urban quasi-  
815 ultrafine particles from primary and secondary sources, *Atmos. Environ.*, 43(40), 6360–6368,  
816 <https://doi.org/10.1016/j.atmosenv.2009.09.019>, 2009.

817 Vidrio, E., Phuah, C. H., Dillner, A. M., & Anastasio, C.: Generation of hydroxyl radicals from ambient fine  
818 particles in a surrogate lung fluid solution, *Environ. Sci. and Technol.*, 43(3), 922–927,  
819 <https://doi.org/10.1021/es801653u>, 2009.

820 Visentin, M., Pagnoni, A., Sarti, E., and Pietrogrande, M. C.: Urban PM<sub>2.5</sub> oxidative potential: Importance  
821 of chemical species and comparison of two spectrophotometric cell-free assays, *Environ. Pollut.*, 219,  
822 72–79, <https://doi.org/10.1016/j.envpol.2016.09.047>, 2016.

823 Vondráček, J., Pěňčíková, K., Neča, J., Ciganek, M., Grycová, A., Dvořák, Z., and Machala, M.: Assessment  
824 of the aryl hydrocarbon receptor-mediated activities of polycyclic aromatic hydrocarbons in a human  
825 cell-based reporter gene assay, *Environ. Pollut.*, 220, 307–316,  
826 <https://doi.org/10.1016/j.envpol.2016.09.064>, 2017.

827 Wan, C. P., Myung, E., and Lau, B. H. S.: An automated micro-fluorometric assay for monitoring oxidative  
828 burst activity of phagocytes, *J. Immunol. Methods*, 159(1–2), 131–138, [https://doi.org/10.1016/0022-1759\(93\)90150-6](https://doi.org/10.1016/0022-1759(93)90150-6), 1993.

830 Wan, R., Mo, Y., Feng, L., Chien, S., Tollerud, D. J., and Zhang, Q.: DNA damage caused by metal  
831 nanoparticles: Involvement of oxidative stress and activation of ATM, *Chem. Res. Toxicol.*, 25(7), 1402–  
832 1411, <https://doi.org/10.1021/tx200513t>, 2012.

833 Wang, D., Pakbin, P., Shafer, M. M., Antkiewicz, D., Schauer, J. J., and Sioutas, C.: Macrophage reactive  
834 oxygen species activity of water-soluble and water-insoluble fractions of ambient coarse, PM<sub>2.5</sub> and  
835 ultrafine particulate matter (PM) in Los Angeles, *Atmos. Environ.*, 77, 301–310,  
836 <https://doi.org/10.1016/j.atmosenv.2013.05.031>, 2013.

837 Wang, Y., Puthussery, J. V., Yu, H., and Verma, V.: Synergistic and antagonistic interactions among  
838 organic and metallic components of the ambient particulate matter (PM) for the cytotoxicity measured  
839 by Chinese hamster ovary cells, *Sci. Total Environ.*, 736, 139511,  
840 <https://doi.org/10.1016/j.scitotenv.2020.139511>, 2020.

841 Wang, Z., Li, N., Zhao, J., White, J. C., Qu, P., and Xing, B.: CuO nanoparticle interaction with human  
842 epithelial cells: Cellular uptake, location, export, and genotoxicity, *Chem. Res. Toxicol.*, 25(7), 1512–  
843 1521, <https://doi.org/10.1021/tx3002093>, 2012.

844 Wragg, F. P. H., Fuller, S. J., Freshwater, R., Green, D. C., Kelly, F. J., and Kalberer, M.: An automated  
845 online instrument to quantify aerosol-bound reactive oxygen species (ROS) for ambient measurement  
846 and health-relevant aerosol studies. *Atmos. Meas. Tech.*, 9(10), 4891–4900,  
847 <https://doi.org/10.5194/amt-9-4891-2016>, 2016.

848 Wu, J., Zhong, T., Zhu, Y., Ge, D., Lin, X., and Li, Q.: Effects of particulate matter (PM) on childhood  
849 asthma exacerbation and control in Xiamen, China, *BMC Pediatr.*, 19(1), 1–11,  
850 <https://doi.org/10.1186/s12887-019-1530-7>, 2019.

851 Xiong, Q., Yu, H., Wang, R., Wei, J., and Verma, V.: Rethinking Dithiothreitol-Based Particulate Matter  
852 Oxidative Potential: Measuring Dithiothreitol Consumption versus Reactive Oxygen Species Generation.  
853 *Environ. Sci. and Technol.*, 51(11), 6507–6514, <https://doi.org/10.1021/acs.est.7b01272>, 2017.

854 Xu, F., Shi, X., Qiu, X., Jiang, X., Fang, Y., Wang, J., Hu, D. and Zhu, T.: Investigation of the chemical  
855 components of ambient fine particulate matter (PM<sub>2.5</sub>) associated with in vitro cellular responses to  
856 oxidative stress and inflammation, *Environ. Int.*, 136, 105475,  
857 <https://doi.org/10.1016/j.envint.2020.105475>, 2020.

858 Yang, B. Y., Guo, Y., Morawska, L., Bloom, M. S., Markevych, I., Heinrich, J., Dharmage, S. C., Knibbs, L. D.,  
859 Lin, S., Yim, S. H. L., Chen, G., Li, S., Zeng, X. W., Liu, K. K., Hu, L. W., and Dong, G. H.: Ambient PM<sub>1</sub> air  
860 pollution and cardiovascular disease prevalence: Insights from the 33 Communities Chinese Health  
861 Study, *Environ. Int.*, 123, 310–317, <https://doi.org/10.1016/j.envint.2018.12.012>, 2019.

862 Yang, M., Ahmed, H., Wu, W., Jiang, B., and Jia, Z.: Cytotoxicity of Air Pollutant 9,10-  
863 Phenanthrenequinone: Role of Reactive Oxygen Species and Redox Signaling, *BioMed Res. Int.*, 2018,  
864 <https://doi.org/10.1155/2018/9523968>, 2018.

865 Yu, H., Puthussery, J. V., and Verma, V.: A semi-automated multi-endpoint reactive oxygen species  
866 activity analyzer (SAMERA) for measuring the oxidative potential of ambient PM<sub>2.5</sub> aqueous extracts,  
867 *Aerosol Sci. and Technol.*, 54(3), 304–320, <https://doi.org/10.1080/02786826.2019.1693492>, 2019.

868 Yu, H., Wei, J., Cheng, Y., Subedi, K., and Verma, V.: Synergistic and Antagonistic Interactions among the  
869 Particulate Matter Components in Generating Reactive Oxygen Species Based on the Dithiothreitol  
870 Assay, *Environ. Sci. and Technol.*, 52(4), 2261–2270, <https://doi.org/10.1021/acs.est.7b04261>, 2018.

871 Zhou, J., Bruns, E. A., Zotter, P., Stefenelli, G., Prévôt, A. S. H., Baltensperger, U., El-Haddad, I., and  
872 Dommen, J.: Development, characterization and first deployment of an improved online reactive oxygen  
873 species analyzer, *Atmos. Meas. Tech.*, 11, 65–80, <https://doi.org/10.5194/amt-11-65-2018>, 2018.

874 Zmirou, D., Gauvin, S., Pin, I., Momas, I., Just, J., Sahraoui, F., Moullec, Y.L., Bremont, F., Cassadou, S.,  
875 Albertini, M., Lauvergne, N., Chiron, M., and Labbe, A.: Five epidemiological studies on transport and  
876 asthma: objectives, design and descriptive results, *J. Exp. Sci. Environ. Epidemiol.*, 12(3), 186-196,  
877 <https://doi.org/10.1038/sj.jea.7500217>, 2002.

878

879

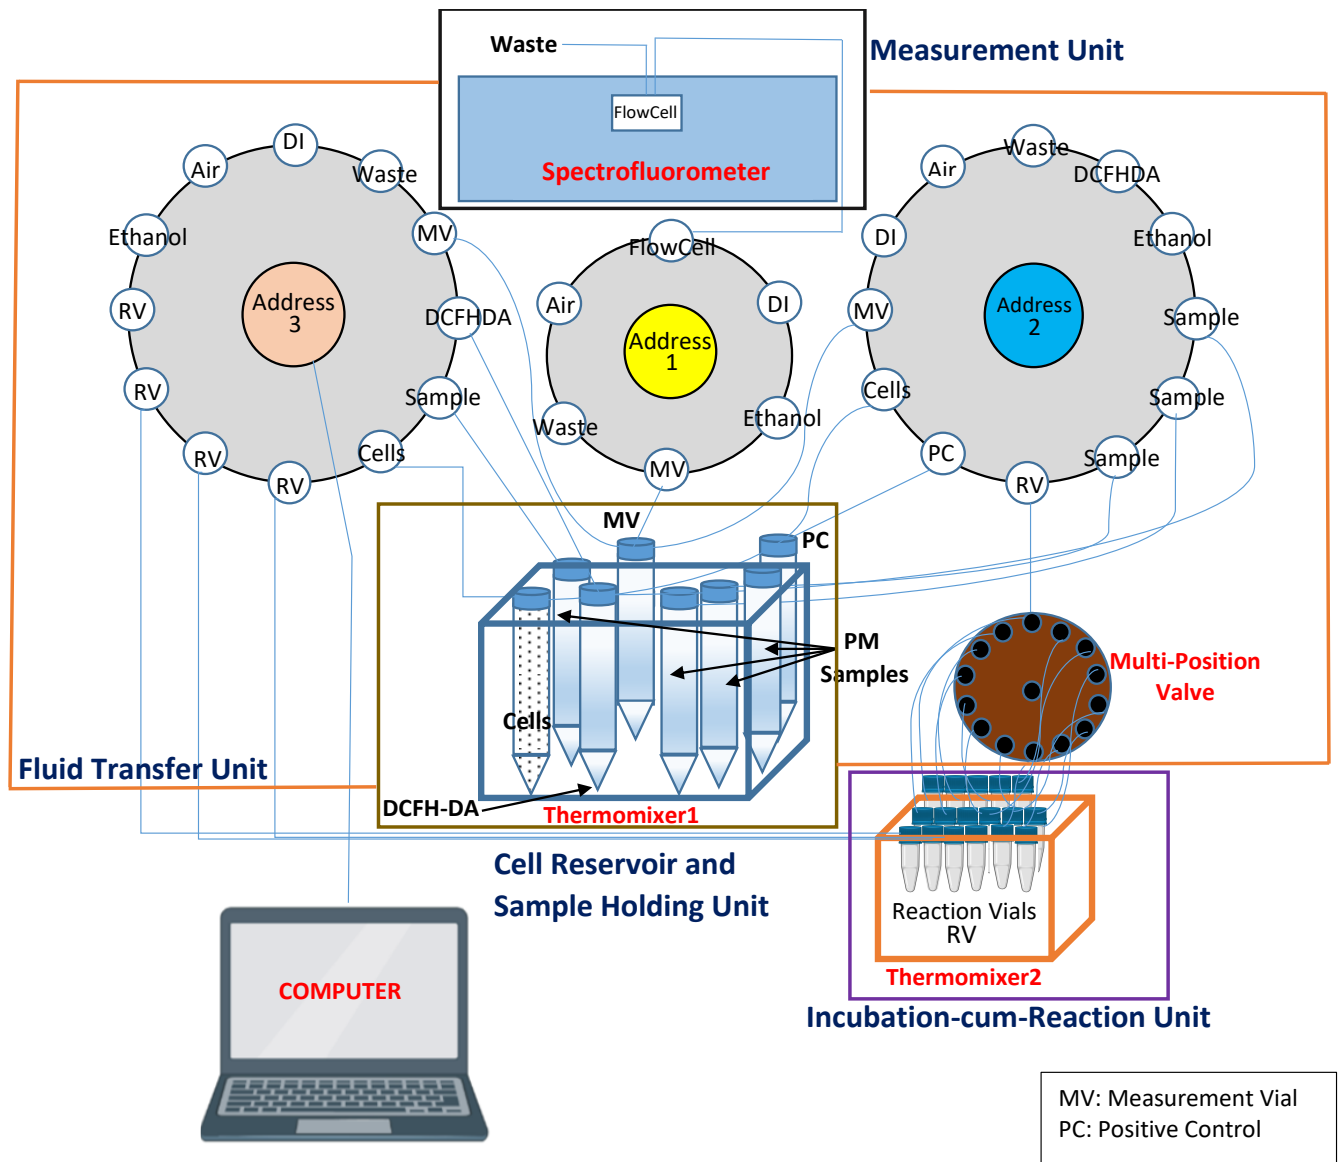

880

881 *Figure 4: Automated System Setup. The instrument consists of four major units: cells reservoir and samples holder, fluid transfer*  
 882 *unit, incubation-cum-reaction unit, and the measurement unit. The cells reservoir and sample holder unit consists of a set of*  
 883 *several vials, containing cells, DCFH-DA solution, and the samples, all kept in Thermomixer 1. The fluid transfer unit consists of*  
 884 *three syringe pumps (Pump #1, 2, and 3) and a 14-port multi-position valve connected to Pump #2. The incubation-cum-reaction*  
 885 *unit consists of 17 Reaction Vials (RV), held in Thermomixer 2. The measurement unit consists of a spectrofluorometer equipped*  
 886 *with a Flowcell.*



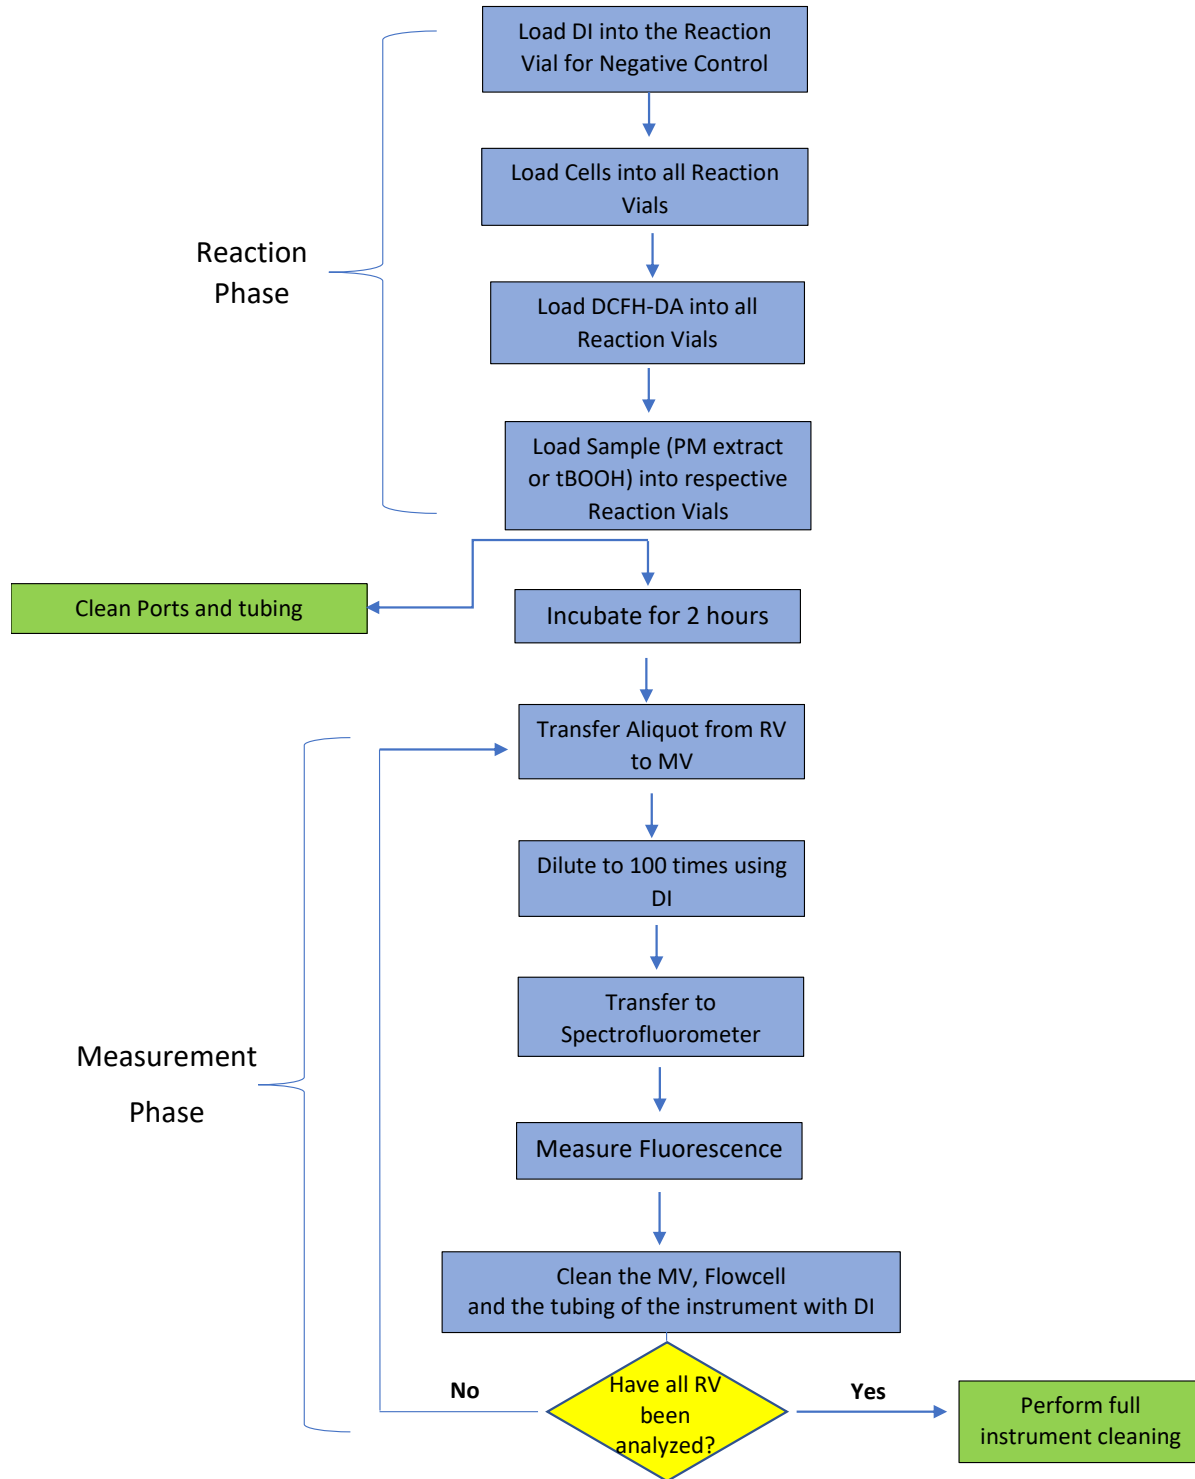

887

888 *Figure 5: Algorithm for the instrument's operational protocol.*

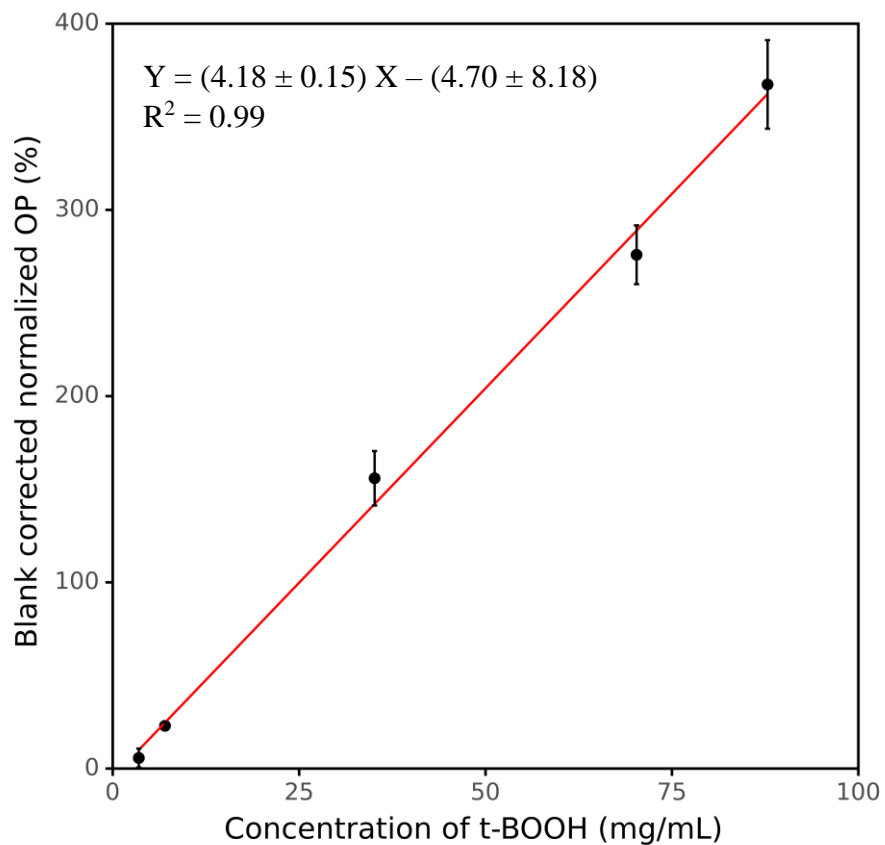

889

890 *Figure 6: OP as a function of the concentration of t-BOOH, measured by our automated instrument. The values on Y- axis were*  
 891 *obtained by dividing absolute fluorescence of the sample by absolute fluorescence of negative control and then blank correcting*  
 892 *it (i.e., subtracting 1 from ratio and then multiplying it by 100).*

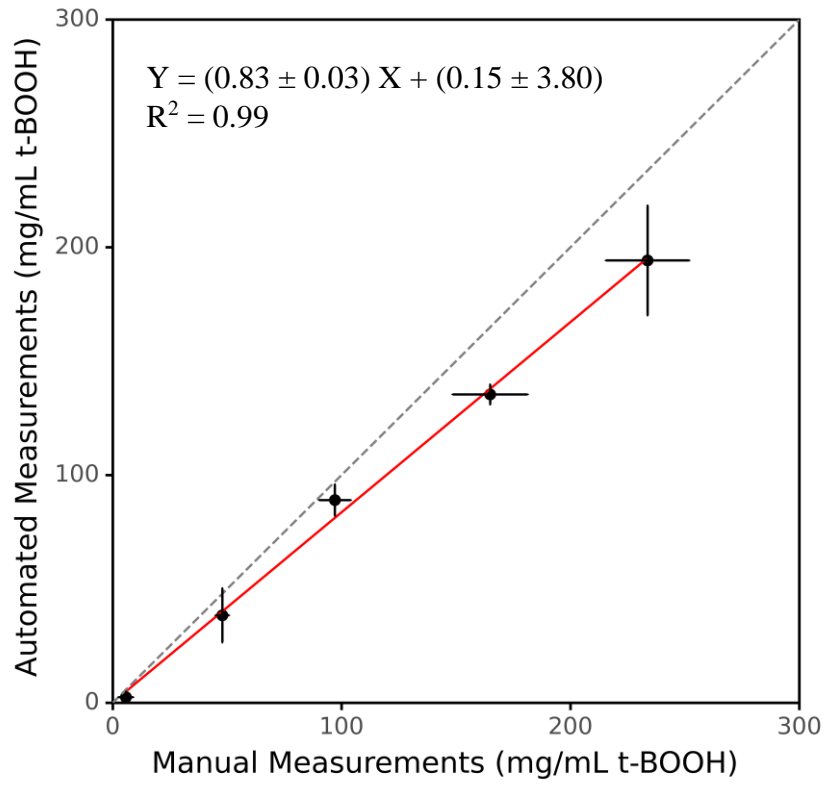

893

894 *Figure 7: Comparison between manual and automated measurements of OP for a positive control (t-BOOH). Dotted line*  
895 *represents the identity line.*

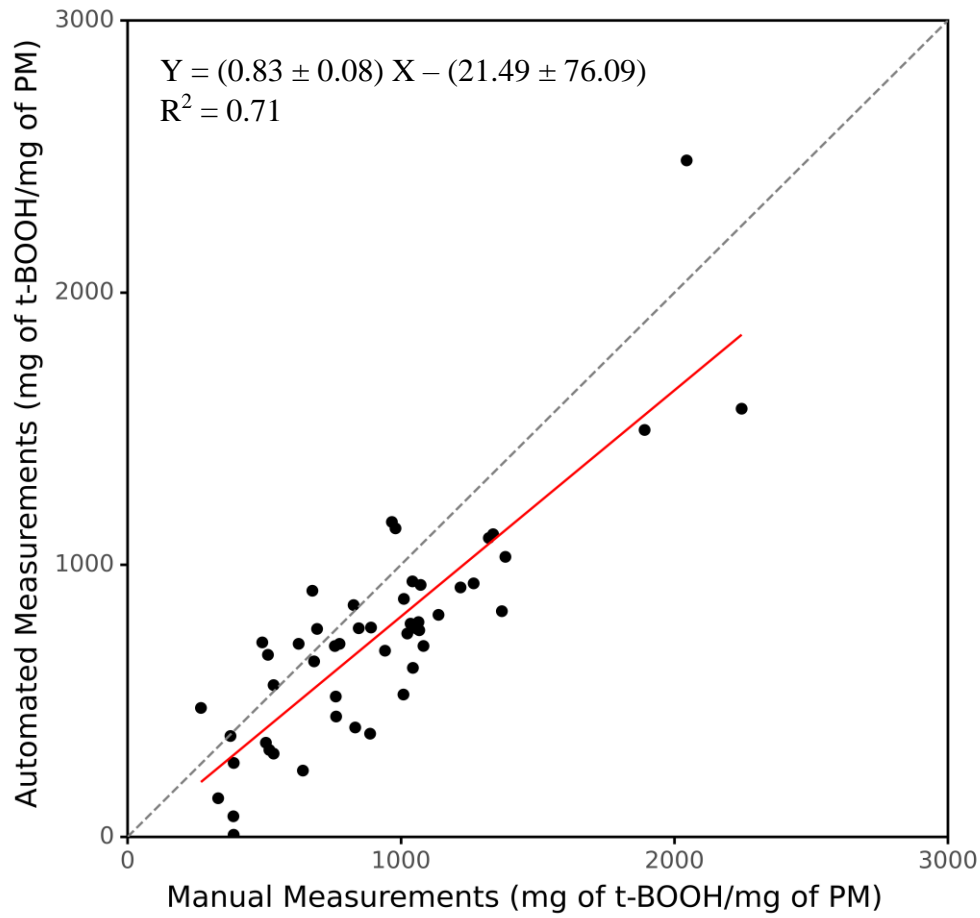

896

897 *Figure 8: Comparison of the OP for manual vs. automated operation using ambient PM samples (N=50). Dotted line represents*  
 898 *the identity line.*

899

900

901

902

903

904

905

906

907



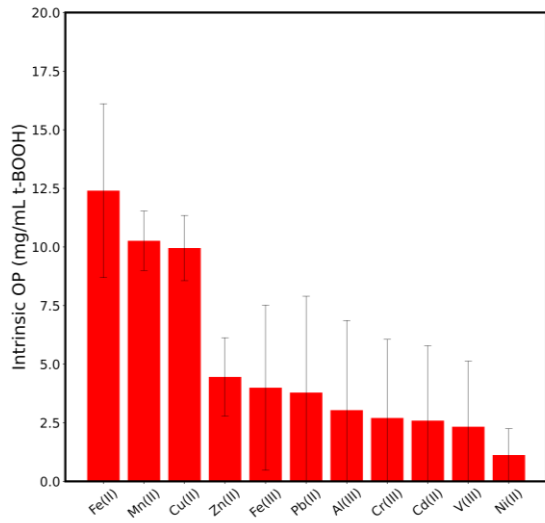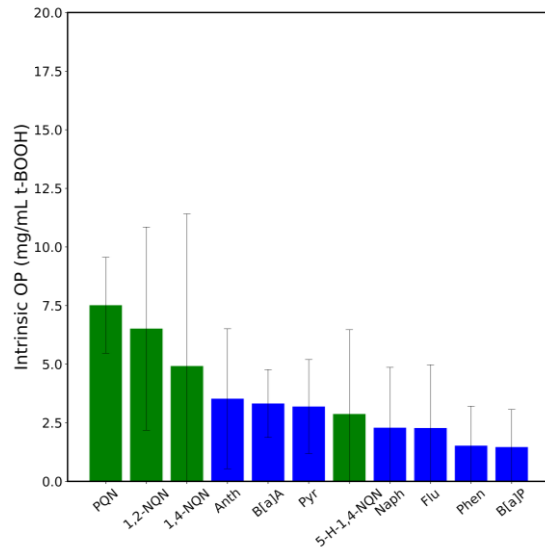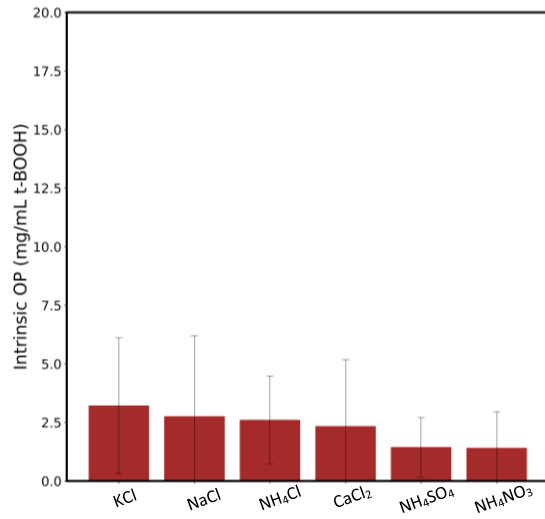

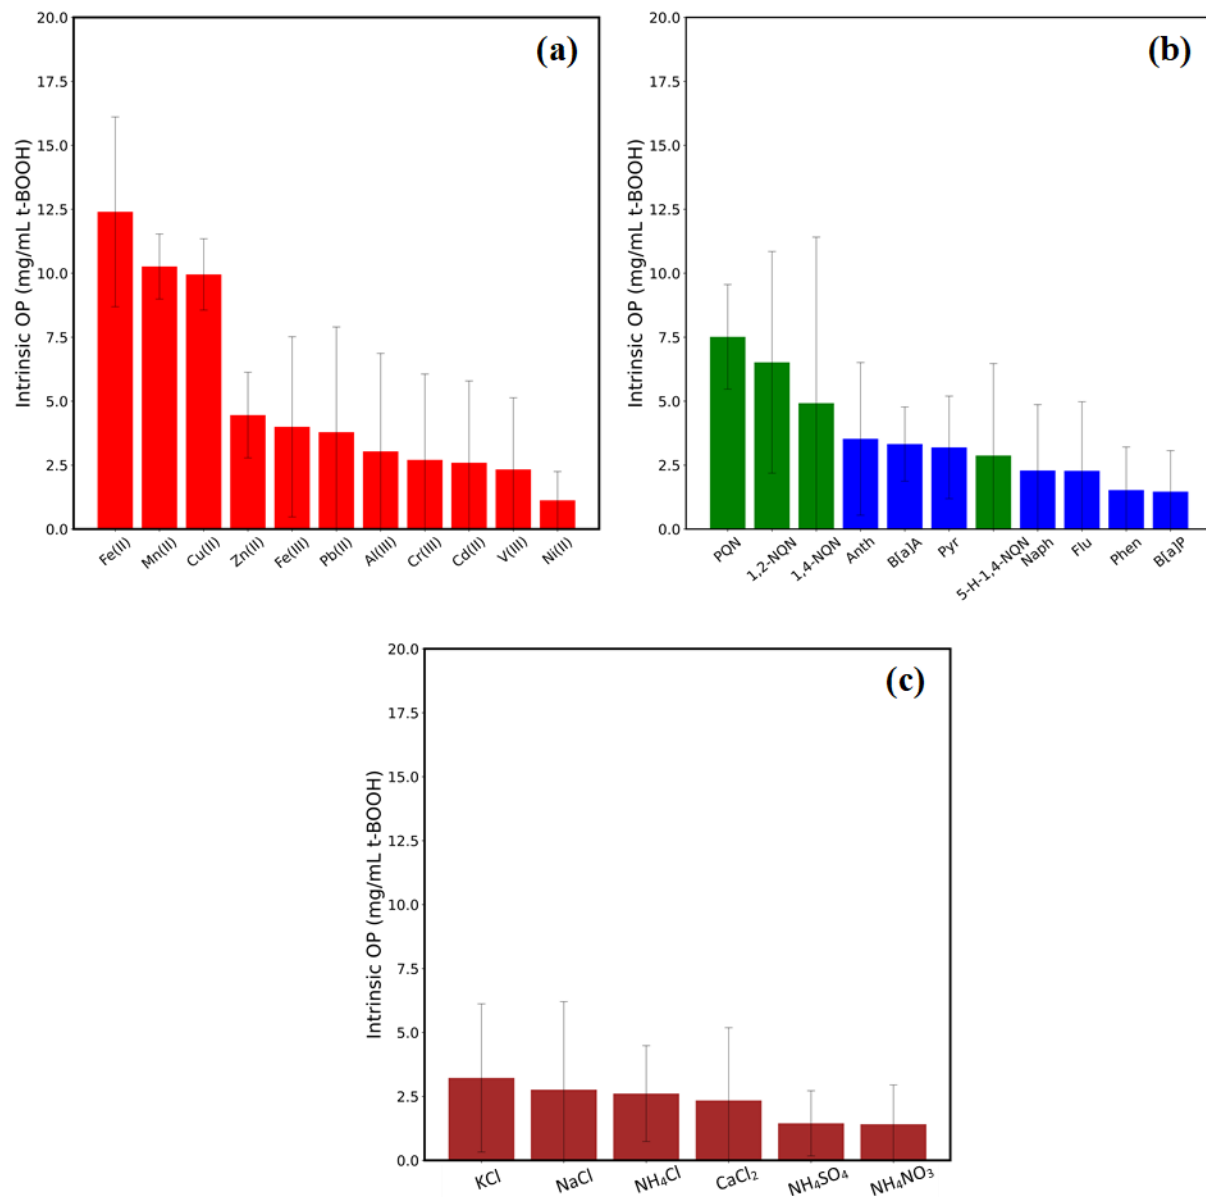

910

911

912 *Figure 9: Intrinsic OP of 11 transition metals (panel a), 4 quinones and 7 PAHs (panel b), and 6 inorganic salts (panel c). The*  
 913 *concentration in the RV was 0.5 μM for all the metals; 0.2 μM for all quinones and PAHs, and 5 μM for inorganic salts, except for*  
 914 *NaCl (1 μM). Error bars represent one standard deviation from the average.*

915

916

917

918 *Table 1: Limit of detection and precision of the instrument obtained through the measurements of field blanks, positive control*  
 919 *and ambient PM samples (n = 10)*

| Sample            | Unit                  | Average | Standard Deviation | LoD  | CoV (%) |
|-------------------|-----------------------|---------|--------------------|------|---------|
| Field Blank       | mg/mL t-BOOH          | 5.30    | 0.42               | 1.26 | 7.95    |
| t-BOOH            | % ROS response        | 684.71  | 111.13             | -    | 16.23   |
| Cu (II)           | mg/mL t-BOOH          | 71.05   | 10.18              | -    | 14.33   |
| Zyosan            | mg/mL t-BOOH          | 18.84   | 7.15               | -    | 37.97   |
| Ambient PM sample | mg of t-BOOH/mg of PM | 402.01  | 57.93              | -    | 14.41   |

920

921
